1 **Electrostatic interactions at the five-fold axis alter heparin-binding**  
2 **phenotype and drive EV-A71 virulence in mice**

3 Han Kang Tee<sup>1</sup>, Chee Wah Tan<sup>1</sup>, Thinesshwary Yogarajah<sup>1</sup>, Michelle Hui Pheng Lee<sup>1</sup>, Hann  
4 Juang Chai<sup>2</sup>, Nur Aziah Hanapi<sup>3</sup>, Siti R. Yusof<sup>3</sup>, Kien Chai Ong<sup>4</sup>, Vannajan Sanghiran Lee<sup>5</sup>, I-  
5 Ching Sam<sup>1</sup>, Yoke Fun Chan<sup>1\*</sup>

6

7 <sup>1</sup>Department of Medical Microbiology, Faculty of Medicine, University of Malaya, Kuala  
8 Lumpur, Malaysia.

9 <sup>2</sup>Department of Pharmacology, Faculty of Medicine, University of Malaya, Kuala Lumpur,  
10 Malaysia.

11 <sup>3</sup>Centre for Drug Research, Universiti Sains Malaysia, Penang, Malaysia.

12 <sup>4</sup>Department of Biomedical Science, Faculty of Medicine, University of Malaya, Kuala  
13 Lumpur, Malaysia.

14 <sup>5</sup>Department of Chemistry, Faculty of Science, University of Malaya, Kuala Lumpur, Malaysia.

15

16 Short title: Electrostatic interaction shapes EV-A71 virulence in mice

17 \*Corresponding author

18 Email: [chanyf@um.edu.my](mailto:chanyf@um.edu.my) (YFC)

## 19 Abstract

20 Enterovirus A71 (EV-A71) causes hand, foot and mouth disease epidemics with neurological  
21 complications and fatalities. However, the neuropathogenesis of EV-A71 remains poorly  
22 understood. In mice, adaptation and virulence determinants have been mapped to mutations at  
23 VP1-145, VP1-244 and VP2-149. We hypothesized that heparin-binding phenotype shapes  
24 EV-A71 virulence in mice. We constructed six viruses with varying residues at VP1-98, VP1-  
25 145 (which are both heparin-binding determinants) and VP2-149 (based on the wild type  
26 98E/145Q/149K, termed EQK) to generate KQK, KEK, EEK, EEI and EQI variants. We  
27 demonstrated that the weak heparin-binder EEI was highly lethal in mice. The initially strong  
28 heparin-binding EQI variant acquired an additional mutation VP1-K244E, which confers weak  
29 heparin-binding phenotype resulting in elevated viremia and increased brain inflammation and  
30 virus antigens in mice, with subsequent high virulence. EEI and EQI-K244E variants  
31 inoculated into mice disseminated efficiently and displayed high viremia. Increasing  
32 polymerase fidelity and impairing recombination of EQI attenuated virulence, suggesting the  
33 importance of population diversity in EV-A71 pathogenesis *in vivo*. Combining *in silico*  
34 docking and deep sequencing approaches, we inferred that virus population diversity is shaped  
35 by electrostatic interactions at the five-fold axis of the virus surface. Electrostatic surface  
36 charges facilitate virus adaptation by generating poor heparin-binding variants for better *in vivo*  
37 dissemination in mice, likely due to reduced adsorption to heparin-rich peripheral tissues,  
38 which ultimately results in increased neurovirulence. The dynamic switching from heparin-  
39 binding to weak heparin-binding phenotype *in vivo* explained the neurovirulence of EV-A71.

40

## 41 **Author summary**

42 Enterovirus A71 (EV-A71) is the primary cause of hand, foot and mouth disease, and it can  
43 also infect the central nervous system and cause fatal outbreaks in young children. EV-A71  
44 pathogenesis remains elusive. In this study, we demonstrated that EV-A71 variants with strong  
45 affinity to heparan sulfate (heparin) have a growth advantage in tissue culture, but are  
46 disadvantageous *in vivo*. When inoculated into mice, strong heparin-binding virus variants are  
47 more likely to be adsorbed to peripheral tissues, resulting in impaired ability to disseminate  
48 and being cleared from the bloodstream rapidly. The lower viremia level resulted in no  
49 neuroinvasion. In contrast, weak heparin-binding variants show greater levels of viremia,  
50 dissemination and subsequent neurovirulence in mice. We also provide evidence that the ability  
51 of EV-A71 to bind heparin is mediated by electrostatic surface charges due to amino acids on  
52 the virus capsid surface. In mice, EV-A71 undergoes adaptive mutation to acquire greater  
53 negative surface charges, thus generating new virulent variants with weak heparin-binding  
54 which allows greater viral spread. Our study underlines the importance of electrostatic surface  
55 charges in shaping EV-A71 virulence.

56

## 57 Introduction

58 Enterovirus A71 (EV-A71) causes cyclical outbreaks of hand, foot and mouth disease (HFMD)  
59 in the Asia-Pacific region [1]. HFMD primarily affects children younger than 5 years old. The  
60 clinical manifestations are usually mild and characterized by fever, oral ulcers and skin rashes  
61 on hands and feet [2, 3]. In some cases, infection also results in severe neurological  
62 complications, including encephalitis, aseptic meningitis, acute flaccid paralysis and death [4].  
63 There are no licensed antivirals, and licensed vaccines are only available in China. The EV-  
64 A71 genome encodes a polyprotein with a single open reading frame (ORF) flanked by 5' and  
65 3' untranslated region [5]. The polyprotein is cleaved into four capsid proteins (VP1 to VP4)  
66 and seven nonstructural proteins (2A, 2B, 2C and 3A to 3D). The capsids form a protomer, and  
67 five protomers form a pentamer, and then twelve pentamers assembled around a genome  
68 forming a provirion. The five-fold axis symmetry is formed by VP1 and surrounded by a  
69 canyon. Virus-receptor binding at the canyon or other physical alterations such as heat, will  
70 displace the lipid pocket factor, and triggers viral uncoating [6].

71 Multiple receptors including human scavenger receptor class B2 (SCARB2) [7], P-selectin  
72 glycoprotein ligand-1 (PSGL-1) [8], heparan sulfate [9], sialylated glycan [10, 11], annexin II  
73 [12], vimentin [13] and nucleolin [14] have roles in EV-A71 attachment or entry. Following  
74 infection, EV-A71 can disseminate to different organs and invade the human central nervous  
75 system (CNS) [15, 16]. However, the neuropathogenesis of EV-A71 remains unclear and  
76 virulence determinants are not well elucidated. Recent reports have shown that EV-A71 strains  
77 with VP1-G/Q145 were more frequently isolated from severe HFMD with neurological  
78 complications [17-21]. However, the results contradicted *in vivo* studies which showed that  
79 VP1-E145 strains but not Q/G145 exhibit higher virulence and lethality in murine models [22-  
80 25]. These findings were also consistent with studies in cynomolgus monkeys, in which strong  
81 selection of VP1-E145 over VP1-G145 was observed [26]. VP1-Q/G145 residues but not VP1-  
82 E145 are responsible for binding to the receptor PSGL-1 [27]. Both VP1-E145 and VP2-I149  
83 mutations conferred murine cell adaptation and increased mouse virulence [22, 24].

84 Neurotropism and neurovirulence has been previously related to the virus binding to heparan  
85 sulfate (heparin), a negatively charged glycosaminoglycan (GAG) found abundantly on most  
86 cell surfaces. Strong affinity for heparin was reported to cause attenuation in viruses such as

87 Theiler's murine encephalomyelitis virus [28], Japanese encephalitis virus [29], Murray Valley  
88 encephalitis virus [29], West Nile virus [30], yellow fever virus [31] and tick-borne encephalitis  
89 virus [32]. In contrast, virus variants with weak heparin-binding resulted in higher mortality in  
90 mice, as shown for Sindbis virus [33] and eastern equine encephalitis virus (EEEV) [34].  
91 Interestingly, variants with strong heparin-binding can contribute to a higher neurovirulence if  
92 inoculated directly into the CNS, as demonstrated with EEEV [35].

93 EV-A71 also utilizes heparan sulfate (heparin) as an attachment receptor [9]. Amino acids  
94 clustered around the five-fold symmetry axis, specifically VP1-98, VP1-145, VP1-242 and  
95 VP1-244 modulate positive charges required for heparin-binding [36]. Positively-charged  
96 VP1-Q/G145 residues are associated with stronger heparin-binding, but not negatively-charged  
97 VP1-E145. The propensity of EV-A71 to acquire positively-charged residues at the five-fold  
98 axis is associated with increased heparin-binding upon *in vitro* culture adaptation [36]. In  
99 contrast, experimental studies of VP1-E145 in mice and monkey studies showed higher  
100 virulence and lethality, and the role of heparin-binding *in vivo* has not been fully characterized.

101 In the current study, we sought to delineate the discrepancy exhibited between *in vitro*  
102 cytopathogenicity due to heparin-binding and association of weak heparin-binding with *in vivo*  
103 virulence. We demonstrated that acquisition by EV-A71 of negative charges at the five-fold  
104 axis reduced heparin-binding capacity. This resulted in high viremia and enhanced lethality in  
105 mice.

## 106 **Results**

### 107 **Construction and rescue of clone-derived virus variants**

108 We have previously described the role of VP1-98 and VP1-145 as modulators of heparin-  
109 binding in cell culture [36]. As the role of heparin remains unknown *in vivo*, in the present  
110 study, we elucidated the role of heparin-binding in shaping EV-A71 virulence in mice. Five  
111 EV-A71 variants were engineered using a wild type EV-A71 strain (5865/SIN/00009,  
112 subgenogroup B4), which possess VP1-E98, VP1-Q145 and VP2-K149 residues (designated  
113 as EQK following amino acid residue order). Site-directed mutagenesis was performed to  
114 generate different combinations of variants, denoted as KQK, KEK, EEK, EEI and EQI (Fig  
115 1A). Some variants had the mouse-adaptive determinant, K149I [22, 24, 37] along with  
116 substitutions in the heparin-binding determinants, VP1-98 and VP1-145. All EV-A71 variants  
117 were viable with comparable plaque morphology (Fig 1B) and were confirmed as genetically  
118 stable by sequencing (data not shown).

119

### 120 **VP1-145 modulates heparin-binding phenotypes of EV-A71 in *in vitro* cell culture**

121 Next, we analyzed the cell-binding ability of EV-A71 variants in RD (human muscle cells), U-  
122 87MG (human neuronal cells) and CHO-K1 (murine cells) cells. In general, all six variants  
123 showed consistent binding phenotypes across human (RD) and murine (CHO-K1) cells (Fig  
124 1C). There was also no significant difference in receptor binding between RD and U-87MG  
125 cells, suggesting no preferential virus tropism between human muscle and neuronal cell lines.  
126 Consistent with our previous findings [36], EV-A71 variants with VP1-E145 (KEK, EEK and  
127 EEI) exhibited lower binding capacity compared to those with VP1-Q145 (EQK, KQK, EQI).  
128 With the additive effect of positively-charged VP1-K98, KQK showed a higher binding  
129 phenotype than wild type EQK across all the cell lines. However, the higher binding phenotype  
130 exhibited by KEK in RD cells compared to wild type could be linked to the compensatory  
131 mutation we reported previously in which VP1-K98 restored virus binding ability in the  
132 presence of VP1-E145 [36].

133 We further investigated the heparin-binding ability of the EV-A71 variants. EV-A71 variants  
134 with VP1-E145 (KEK, EEK and EEI) displayed significant reduction of 29.7%, 18.8% and  
135 37.1% in heparin-binding, respectively (Fig 1D). Similar findings were also observed in a  
136 heparin inhibition assay. Pre-treated heparin inhibition of these three VP1-E145 variants  
137 significantly reduced RD cell viability to 51.5%, 45.5% and 34.3%, respectively (Fig 1E).  
138 Based on these heparin-binding results, the EV-A71 variants were categorized into two groups:  
139 strong heparin binder (EQK, KQK and EQI) and weak heparin binder (KEK, EEK and EEI).

140

#### 141 **Potential association of weak heparin-binding variants with *in vivo* virulence**

142 To determine the role of heparin-binding in EV-A71 *in vivo* virulence, we performed  
143 intraperitoneal (i.p.) infection of one-day old suckling mice with  $1 \times 10^5$  PFU of each EV-A71  
144 variant. The clinical score and survival analysis of infected mice are shown in Fig 2A. EEI-  
145 infected mice exhibited the highest virulence *in vivo*, with all the infected mice dying by day 4  
146 post-infection. Notably, 66.7% of the EQI-infected mice died by day 12 post-infection,  
147 followed by 20% mortality in EEK-infected mice. Consistent with previous findings [22-24,  
148 38], EV-A71 variants with VP1-E145 were associated with an increased virulence phenotype  
149 in animal models, except for KEK. Mice infected with other EV-A71 variants showed no  
150 apparent clinical signs and survived beyond 13 days post-infection. These data suggest that *in*  
151 *vivo* pathogenicity in mice was increased by an additional VP2-K149I mutation and further  
152 enhanced by weaker heparin-binding conferred by VP1-E145, as demonstrated in the EEI-  
153 infected mice.

154 We further asked why the EQI variant, a strong heparin binder, exhibited a relatively high  
155 virulence in mice. Viral genomic RNA from the brains and hind limbs of dead EQI-infected  
156 mice were harvested for genome sequencing, revealing that the EQI variant had acquired a  
157 VP1-K244E mutation (Fig 2B). This mutation, however, was not present in the EEI-infected  
158 mice (Fig 2C).

159

160 **Emergence of EQI-K244E variant resulted in abolished heparin-binding ability and**  
161 **regaining of virulence**

162 Since VP1-K244 is a key determinant of heparin-binding [36], we speculated that the  
163 emergence of VP1-K244E had abolished the heparin-binding ability of the EQI variant. To  
164 investigate the role of VP1-K244E mutation in heparin-binding and virulence in mice, we  
165 introduced this mutation into the EQI variant through site-directed mutagenesis. The EQI  
166 variant with K244E mutation (termed EQI-K244E) however failed to achieve high virus yield  
167 in tissue culture for subsequent *in vivo* experiments (data not shown). We thus collected EQI-  
168 K244E and EEI from the brain homogenates (indicated with <sup>+</sup>) for subsequent experiments,  
169 after confirming the sequences using Sanger sequencing. EQI-K244E<sup>+</sup> displayed significant  
170 reduction of heparin-binding compared to clone-derived EQI and EEI, and EEI<sup>+</sup> (Fig 3A). To  
171 determine the association of heparin-binding and *in vivo* virulence, we then infected one-day  
172 old suckling mice with clone-derived EEI and EQI-K244E<sup>+</sup> by i.p. administration. Brain  
173 homogenate from EQI-infected surviving mice was also harvested and used as a negative  
174 control (EQI<sup>+</sup>; viral RNA not detected in RT-PCR). At day 4 post-infection, 100% mortality  
175 was observed in EEI and EQI-K244E<sup>+</sup>-infected mice but none of the mice succumbed to EQI<sup>+</sup>  
176 infection (Fig 3B).

177 The hind limb and brain samples from EEI and EQI-K244E<sup>+</sup>-infected mice were then processed  
178 for histopathological analysis, and results supported earlier findings. Immunohistochemical  
179 (IHC) examination revealed massive localization of viral antigens in both EEI and EQI-  
180 K244E<sup>+</sup>-infected muscles, indicating that skeletal muscle is an important replication site (Fig  
181 3C). Inflammation and extensive muscle damage were also observed in the haematoxylin and  
182 eosin (H&E)-stained sections of muscle. In addition, viral antigens were detected in neurons  
183 mainly distributed in the pons and midbrains (Fig 3D). Mononuclear cells infiltrations were  
184 also evident in the cortices. In contrast, no distinctive histopathological change was observed  
185 in the mock-infected organ samples.

186



## 187 **High lethality of weak heparin-binding EV-A71 variants correlates with high viremia**

188 Strong heparin-binding ability confers the advantage of promoting virus attachment on the cell  
189 surface, thus increasing the probability of virus-functional receptor interaction *in vitro* [9].  
190 However, we have demonstrated that a strong heparin-binding phenotype is deleterious to virus  
191 pathogenesis *in vivo*. To unravel the discrepancy of cytopathogenicity *in vitro* and *in vivo*  
192 virulence, we investigated virus dissemination in mice. Following i.p. infection, five mice were  
193 sacrificed for viral load quantitation in brain and hind limbs. EEI and EQI-K244E<sup>+</sup> variants  
194 replicated to higher titers than EQI in both hind limbs and brain, at 2 and 4 days post-infection  
195 (Fig 4A).

196 To investigate the attribution of viremia to *in vivo* pathogenesis, three- to four-week-old mice  
197 were infected intravenously with EQK, EEI, EQI and EQI-K244E<sup>+</sup> variants. Blood samples  
198 were then collected at 5, 15 and 30 min post-inoculation for viral load quantitation. Both strong  
199 heparin-binding variants, EQK and EQI showed rapid viral clearance, with approximately 70%  
200 cleared from the bloodstream at 30 minutes (Fig 4B). Only about 23% of EEI had been cleared  
201 by 30 minutes post-infection. A sustained viremia level with minimal clearance was observed  
202 in EQI-K244E<sup>+</sup>-infected mice. Our data indicated stronger heparin-binding resulted in low  
203 viremia levels in the host, which may be due to adsorption and sequestration of viruses in  
204 surrounding tissues. The low viremia level may render the virus less efficient in disseminating  
205 to other organs, as seen in EQK and EQI variants.

206

## 207 **High fidelity and impairing recombination attenuate *in vivo* virulence of EQI**

208 The emergence of a weak heparin-binding variant with VP1-K244E mutation is the key  
209 determinant of *in vivo* adaptation and pathogenesis of EQI. We hypothesized that EQI is  
210 avirulent without the acquisition of the VP1-K244E mutation *in vivo*. To reduce mutation rates  
211 and restrict generation of viral quasispecies, we engineered the viral RNA-dependent RNA  
212 polymerase (RdRp) of EQI to harbor previously identified high-fidelity mutations G64R and  
213 L123F (abbreviated as HF in Fig 5A) [39-41] and recombination deficient mutation Y276H  
214 (labelled as Rec<sup>-</sup>) [42]. We employed a luciferase-based replicon system to assess the impact  
215 of these mutations on genome replication. As demonstrated in Fig 5B, no significant

216 differences in luciferase activities were observed between wild type EV-A71 Nluc Rep, EV-  
217 A71 Nluc Rep-HF and EV-A71 Nluc Rep-Rec<sup>-</sup>, suggesting that these mutated RdRp variants  
218 replicate as efficiently as the wild type. Next, we generated and rescued the EQI-HF and EQI-  
219 Rec<sup>-</sup> virus variants. These EQI-HF and EQI-Rec<sup>-</sup> variants were genetically stable with no  
220 reversion of mutations and emergence of VP1-244E observed after a few passages, in addition  
221 to indistinguishable plaque morphology to EQI (data not shown).

222 To characterize the impact of increased fidelity and recombination deficiency on *in vivo*  
223 virulence, one-day old suckling mice were infected with EQI, EQI-HF and EQI-Rec<sup>-</sup>. Half of  
224 the EQI-infected mice died by day 12 post-infection (Fig 5C), while none of the mice died  
225 following EQI-HF and EQI-Rec<sup>-</sup> infection. A reduced ability of the EQI strain to undergo  
226 mutations was associated with loss of *in vivo* virulence, although we were unable to recover  
227 EQI-HF and EQI-Rec<sup>-</sup> viruses from surviving mice to definitively show that this was due to  
228 lack of the VP1-K244E mutation.

229

### 230 **Emergence of VP1-K244E is important for neuroinvasion**

231 To determine if emergence of the VP1-K244E mutation is critical for systemic dissemination,  
232 we next examined neurovirulence (the ability to directly infect the CNS) of all the EV-A71  
233 variants following direct intracerebral inoculation. A dose of  $1 \times 10^5$  PFU of each of the EV-  
234 A71 variants was intracerebrally injected into separate litters of one-day old mice (Fig 6).  
235 Similar mortality rates (100% mortality at day 4 post-infection) were shown by the EEI and  
236 EQI-K244E<sup>+</sup> variants, the former having been earlier shown to be highly lethal following i.p.  
237 infection (Fig 2A). Notably, EQI infection, which caused 66.7% mortality when inoculated  
238 intraperitoneally, now showed a remarkable drop of virulence to 8.3% mortality following i.c.  
239 infection. Detection of the VP1-K244E mutation by sequencing in organ samples from dead  
240 EQI-infected mice further confirmed its importance as a neuroinvasion determinant (data not  
241 shown). The remaining virus variants did not cause any disease symptoms in mice, and no virus  
242 was detected. Taken together, our data indicates that the critical mutation conferring  
243 neuroinvasive phenotype to the EQI variant is VP1-K244E, which mainly arises during  
244 systemic dissemination when EQI is inoculated intraperitoneally and not directly into the brain.

245

246 **Uncharged VP1-244 intermediate variant emerged during transition to EQI-K244E**

247 To investigate how the VP1-K244E mutation emerges during *in vivo* infection, a litter of 14  
248 suckling mice was intraperitoneally infected with EQI. The mice were sacrificed at day 3, 7  
249 and 11 post-infection or when moribund to harvest hind limbs and brains for next-generation  
250 sequencing of the virus population diversity. At day 9 post-infection, two moribund mice were  
251 collected. We first screened all the harvested samples using RT-PCR. At day 3 post-infection,  
252 none of the collected organs were positive for EV-A71 (Fig 7A). All five muscle samples  
253 collected were positive for EV-A71 at day 7 post-infection, suggested that viruses were  
254 replicating in skeletal muscles, but brain samples were negative suggesting that limited virus  
255 had disseminated to the brain at this time point. As expected, both muscle and brain samples  
256 collected from the moribund mice at day 9 post-infection were positive for EV-A71. None of  
257 the remaining mice collected at day 11 post-infection were positive for EV-A71 RNA in both  
258 hind limbs and brain.

259 Deep sequencing of the EV-A71-positive organ samples revealed that the VP1-Q145 residue  
260 was highly stable with > 99% variant frequency (Fig 7B). The frequency of VP1-Q145E  
261 mutation in these samples was lower than 0.1% (labelled with # in Fig 7B). To our surprise, 7  
262 dpi-M5 sample displayed a poor sequencing coverage and therefore was eliminated from the  
263 analysis. We observed a sequential transition of K244 to E244 from day 7 to day 9 post-  
264 infection. At day 7 post-infection, VP1-K244 was predominant in two out of four hind limb  
265 samples (M1 and M2), while only a single sample (M4) showed VP1-E244 as the dominant  
266 viral population. Notably, we identified a novel substitution, VP1-K244T from the hind limb  
267 of sample M3 with high frequency of 90%. As infection progressed, VP1-E244 was solely  
268 detected in the organs harvested at day 9 post-infection, further affirming the contribution of  
269 VP1-E244 to *in vivo* virulence. Apart from VP1-244 and 145, we also detected other non-  
270 synonymous mutations previously linked to heparin-binding from the harvested samples,  
271 including VP1-L97R, N104S and E167G (Table 1). The emergence of uncharged T244  
272 intermediate during the transition from positively-charged K244 to negatively-charged E244  
273 showed the high plasticity of EV-A71 in generating compensatory mutations *in vivo*.

274

275 **Table 1. Non-synonymous mutations related to HS binding detected from different organ**  
 276 **samples of EQI-infected mice**

277

| Samples                    | L97      |               | E98      |               | N104     |               | Q145     |               | E167     |               | K244     |               |
|----------------------------|----------|---------------|----------|---------------|----------|---------------|----------|---------------|----------|---------------|----------|---------------|
|                            | Mutation | Frequency (%) | Mutation | Frequency (%) | Mutation | Frequency (%) | Mutation | Frequency (%) | Mutation | Frequency (%) | Mutation | Frequency (%) |
| <b>Input control (EQI)</b> |          |               | E98Q     | 6.06          |          |               |          |               | E167G    | 19.11         |          |               |
|                            |          |               | E98G     | 4.69          |          |               |          |               | E167Q    | 3.84          |          |               |
|                            |          |               | E98V     | 2.32          |          |               |          |               |          |               |          |               |
| 7 dpi M1                   |          |               |          |               |          |               |          |               |          |               |          |               |
| 7 dpi M2                   |          |               |          |               |          |               |          |               | E167G    | 99.77         |          |               |
| 7 dpi M3                   |          |               |          |               | N104S    | 99.34         |          |               |          |               | K244T    | 98.71         |
| 7 dpi M4                   |          |               |          |               | N104S    | 98.25         |          |               |          |               | K244E    | 99.16         |
| 9 dpi B1                   |          |               |          |               | N104S    | 99.88         |          |               |          |               | K244E    | 99.83         |
| 9 dpi M1                   |          |               |          |               | N104S    | 99.45         |          |               |          |               | K244E    | 99.86         |
| 9 dpi B2                   |          |               |          |               |          |               |          |               |          |               | K244E    | 99.12         |
| 9 dpi M2                   | L97R     | 99.49         |          |               |          |               |          |               |          |               | K244E    | 99.45         |

278

279 \*Non-synonymous mutations are categorized into three different groups based on their  
 280 frequency of detection in NGS. Variant frequencies of 1-90% and > 90% are highlighted in  
 281 blue and green, respectively.

## 282 **Weak heparin-binding is due to loss of electrostatic interactions at the five-fold axis**

283 EEI was experimentally proven to be highly lethal in mice. However, we observed that EQI  
284 selectively acquires VP1-K244E over the VP1-Q145E mutation to gain neuroinvasive and  
285 neurovirulent properties (Figs 3B & 6). We reasoned that VP1-E244 exhibits weaker heparin-  
286 binding ability compared to VP1-E145, and therefore, could be favorably selected *in vivo*. We  
287 employed *in silico* analysis to characterize the heparin-binding affinity of VP1-E145 and VP1-  
288 E244. VP1-98, 145 and 244 are located around the five-fold axis of the EV-A71 pentamer (Fig  
289 8A). Based on the electrostatic maps, the five-fold axis of the EQI variant is highly positive-  
290 charged (Fig 8B), implying strong affinity to heparin. With the VP1-Q145E substitution, EEI  
291 has lower positive charges at its five-fold axis. Since the VP1-K244 residue is protruding from  
292 the surface of the five-fold axis, substitution of a positively-charged lysine residue to a  
293 negatively-charged glutamic acid at this position greatly reduces the electrostatic potential on  
294 the five-fold axis and changes the capsid conformation.

295 Simulated docking of 12-mer heparin to EV-A71 residues within a 4Å radius revealed no  
296 notable change in interaction energies between EQK (-730.76 kcal/mol) and EQI (-703.71  
297 kcal/mol) (Fig 8C). Substitution of the VP1-Q145E mutation in EEI resulted in a drop of 32.34  
298 kcal/mol interaction energy when compared to EQK. The EQI-K244E variant showed the  
299 weakest heparin-binding ability as the interaction energy drastically dropped to -476.32  
300 kcal/mol. Compared to the EQI-K244E variant, uncharged EQI-K244T variants exhibited  
301 higher interaction energies of -552.21 kcal/mol and -582.89 kcal/mol, respectively. The energy  
302 change was mainly contributed by the VP1-244 residue, with a descending energy order of  
303 K244, T244 and E244, which correlates with the scale of strong to weak heparin-binding (Fig  
304 8D).

305 When examining the heparin docking of non-synonymous variants detected by NGS, the VP1-  
306 E167G mutation had no effect on interaction energy compared to EQI (Fig 8E). Interestingly,  
307 variants with VP1-L97R and VP1-N104S mutations showed slight increase in the interaction  
308 energy of EQI-K244E variants, suggesting an enhanced effect of heparin-binding. Although  
309 EQI-K244E-L97R showed very weak binding strength at the VP1-K244E site similar to EQI-  
310 K244E, a compensatory effect was seen in L97R site which singly contributes to a more  
311 negative interaction energy i.e. strong heparin-binding (Fig 8F). Meanwhile, VP1-N104S  
312 mutation has also increased the heparin-binding of EQI-K244E variant. Taken together,

313 different compensatory mutations emerged to overcome the capsid instability and alter the  
314 virus fitness.

## 315 Discussion

316 As heparin-binding phenotype has been implicated in virulence of some neurotropic viruses,  
317 we studied the relationship between heparin-binding phenotype and mouse neurovirulence in  
318 EV-A71. Our data highlighted the key role of electrostatic interactions in shaping heparin-  
319 binding to confer virulence in mice. Among the weak heparin-binding variants used in this  
320 study (KEK, EEK and EEI), only EEI was associated with increased virulence and virus fitness  
321 *in vivo*. Strikingly, EQI, which should be a strong heparin binder, showed high virulence, and  
322 we showed that this was due to the mutation VP1-K244E, which conferred weak heparin-  
323 binding. This VP1-K244E mutation has been previously identified as a mouse virulence  
324 determinant [43, 44]. Increasing polymerase fidelity or impairing recombination of EQI  
325 restricts the emergence of mutations and abolishes *in vivo* neurovirulence, suggesting the  
326 importance of viral population diversity in EV-A71 pathogenesis, similar to reports on  
327 poliovirus [45, 46]. We showed that selection of individual adaptive mutations with roles in  
328 heparin-binding impacts viral pathogenicity.

329 Six EV-A71 variants were engineered with different amino acids at VP1-98, VP1-145 and  
330 VP2-149. VP1-98 and VP1-145 also have important roles in binding to PSGL-1 found in blood  
331 cells [8]. Both VP1-145 and VP1-149 have been implicated in mouse adaptation and virulence  
332 [22, 23, 25, 43, 47]. The VP1-98 and VP1-145 residues also act as modulators of heparin-  
333 binding in cell culture [36]. EV-A71 uses heparan sulfate as an attachment receptor, but it is  
334 not known how this drives pathogenesis. Heparin-binding may impact virulence outcome  
335 through neuroinvasion or neurovirulence [48]. Unlike SCARB2, heparin has no role in viral  
336 uncoating and internalization [7, 49-51], suggesting that heparin-dependent virulence is  
337 unlikely to be due to virus-functional receptor interaction. In mice, mSCARB2 and mPSGL-1  
338 are known to poorly support EV-A71 infection [49, 52, 53]. Therefore, an unidentified mouse  
339 receptor could be utilized to achieve high viremia and dissemination. The cell binding  
340 properties of the engineered variants were as expected, with EEI, EEK and KEK showing lower  
341 binding due to VP1-145E and/or VP1-98E; and EQK, KQK and EQI showing higher binding  
342 due to VP1-145Q. VP1-149K and VP1-149I did not influence cell binding. This is probably  
343 related to mouse and human-specific tropism, as VP1-149I has only been reported in mouse  
344 studies [22, 43, 47].

345 Establishment of viremia is crucial for further dissemination to other target tissues such as skin  
346 and invasion into CNS [54]. During *in vivo* dissemination, the strong binding affinity of a  
347 heparin binder increases the likelihood of virus being sequestered by tissue GAG, resulting in  
348 rapid virus clearance from blood circulation [31, 33, 55]. This gives rise to a low viremia level  
349 with a substantial reduction of virulence in mice. Kobayashi and colleagues reported that EGK  
350 virus is less virulent compared to EEK due to the former harbouring the VP1-G145 residue,  
351 enabling the virus to adsorb more strongly to HS, resulting in attenuated virulence in SCARB2-  
352 expressing transgenic mice [56]. Our findings that a strong heparin-binding phenotype  
353 attenuates virulence is also observed in other viruses, including Sindbis virus [33], Venezuelan  
354 equine encephalitis virus [55], West Nile virus [30], yellow fever virus [31] and Japanese  
355 encephalitis virus [57]. Using a monkey model, Zhang *et al.* showed that the establishment of  
356 viremia was strongly correlated with EV-A71 neuroinvasion into CNS [16]. A clinical study  
357 correlating prolonged viremia in EV-A71 patients with severe CNS involvement further  
358 suggests the importance of viremia in determining severity outcome [58].

359 We performed intracerebral infection to bypass peripheral dissemination and neuroinvasion,  
360 therefore directly measuring the neurovirulence of each variant. Unlike the weak heparin  
361 binders EEI and EQI-K244E<sup>+</sup>, intracerebrally inoculated EQI failed to exhibit the same  
362 neurovirulent phenotype as it did following i.p. administration, for which we propose two  
363 possible explanations. First, virus replication in brain cells may be restricted. This is supported  
364 by histopathological studies showing very few neurons in brain are infected with EV-A71 [59,  
365 60]. EQI viruses failed to acquire the VP1-K244E mutation, presumably due to lower  
366 infectivity of neurons and suboptimal replication following direct inoculation into brain,  
367 resulting in low virulence in mice. Secondly, viral multiplication in extraneural tissues such as  
368 hind limb skeletal muscle plays a key role in neuropathogenesis [61]. Mice intracerebrally  
369 inoculated with EEI showed higher viral load in hind limb muscles (S1 Fig), implying that the  
370 virus spread to peripheral tissues and underwent further extraneural replication (especially in  
371 the skeletal muscles) before re-entering the brain at high titers [16, 25, 61]. Retrograde axonal  
372 transport is the main transmission route for neuroinvasion [60, 62]. High replication will result  
373 in muscle damage that increases retrograde axonal transport and virus trafficking to the CNS  
374 [63, 64]. The weak heparin binders EEI and EQI-K244E<sup>+</sup> remain lethal since they disseminate  
375 effectively and establish high viremia prior to neuroinvasion. Using an *in vitro* porcine blood  
376 brain barrier (BBB) model (S1 text), we found no correlation between heparin-binding and



377 neuroinvasion across the BBB through tight junction leakages, as demonstrated by EEI and  
378 EQI which induce poorer permeability compared to wild type EQK (S2 Fig). This suggests that  
379 hematogenous spread is not the main route of spread to brain [62]; rather, establishment of high  
380 viremia appears crucial for virus dissemination to other target organs which support high levels  
381 of replication.

382 The mechanism of pathogenesis associated with heparin-binding is driven by electrostatic  
383 interactions at the five-fold axis of the virus surface. Alteration of the five-fold axis may affect  
384 capsid instability resulting in conformational changes which trigger genome uncoating,  
385 bypassing the need for receptor-virus binding. In poliovirus, mouse adaptation is controlled by  
386 a balance between capsid plasticity during uncoating and thermostability of the virion [65].  
387 Similarly, electrostatic repulsion around the five-fold axis which results in capsid instability is  
388 observed in naturally thermo-labile foot-and-mouth-disease virus [66]. In EV-A71, the  
389 observed dynamic switching between weak and strong heparin-binding phenotypes highlights  
390 the importance for the virus to maintain an optimal electrostatic interaction for stable capsid  
391 conformation. Multiple VP1-244 variants (K244, T244 and E244) were generated with  
392 different effects on electrostatic interactions with heparin (K>T>E). As K to E represents a  
393 non-conservative substitution, the virus has evolved to transition through a non-charged residue  
394 (T) which has lower fitness cost during viral dissemination [67, 68]. As GAGs are ubiquitous  
395 in tissues, a natural selective pressure thus exists to revert weak heparin-binding variants to  
396 heparin-binding variants which can then attach to and infect a range of host cells.

397 Three complementary mutations, VP1-L97R, VP1-N104S and VP1-E167G, were detected  
398 along with VP1-K244E from EQI-infected moribund mice. Given that these mutations are near  
399 the VP1-244 residue site and located at loops (S3 Fig A), they could be selectively utilized by  
400 the virus to stabilize the conformational structure of the VP1-K244E mutation at the five-fold  
401 axis. VP1-N104S was frequently associated with the VP1-244 variants. Root mean square  
402 fluctuation (RMSF) was measured to examine the dynamic movement of residues (S3 Fig B);  
403 the RMSF value of the BC loop (where VP1-N104S is located) was relatively higher in EQI-  
404 K244E compared to other virus variants. This indicates that residues within the VP1 BC loop  
405 are flexible and bound poorly to heparin. The emergence of the VP1-N104S mutation could  
406 contribute to the conformational stability of VP1-K244E, resulting in enhanced viral infectivity  
407 [69]. The VP1-L97R mutation, within the VP1 BC loop, has been reported to enhance heparin-

408 binding [70]. This mutation was first detected from EV-A71 in the blood, CSF and stool from  
409 an immunocompromised patient [71]. However, we found this mutation in the skeletal muscle  
410 but not in the brain of a moribund mouse. Similarly, the presence of the VP1-L97R could  
411 stabilize the conformational structure of VP1-K244E. Interestingly, both VP1-L97R and  
412 N104S did not co-exist in the same sample. The VP1-D31G [72] and VP1-E167G [71]  
413 mutations previously implicated in neurotropism in humans were also observed in the brain  
414 samples but at very low frequencies. Dynamic switching between weak and strong heparin-  
415 binding phenotypes has been observed *in vitro* [36, 73]. Furthermore, restricting polymerase  
416 fidelity and impairing recombination rendered the virus avirulent, suggesting that restriction of  
417 population diversity alters fitness of the virus *in vivo*. In the present study, only VP1 was  
418 sequenced, and there may be other genomic changes within the virus genome.

419 We propose that our findings are not only limited to the murine model but may reflect  
420 neuropathogenesis in humans. Strong heparin-binding variants (EQK and EGK) have been  
421 more frequently detected from sequencing of virus cultures than from direct sequencing of  
422 clinical specimens, suggesting that heparin-binding phenotypes are a consequence of  
423 adaptation to tissue culture [18, 20, 23, 71, 74-101] (S1 Table). Detection of VP1-E145 in the  
424 sequences of a fatal encephalitis autopsy specimen [102] further reinforces our view that weak  
425 heparin-binding is associated with virulence in humans, as we have shown in mice in the  
426 present study. EV-A71 infection is usually mild and limited to HFMD, with neurological  
427 complications seen in 0.1-1.1% and deaths in 0.1% to 0.03% [103-107]. The frequent reversion  
428 between heparin-binding and weak heparin-binding variants fulfils the trade-off hypothesis in  
429 which the virus juggles between the cost and benefits of harming the host. Nevertheless in  
430 humans, selection of weak heparin-binding viruses to cause severe neurological disease  
431 appears rare.

432 We have developed a hypothetical EV-A71 pathogenesis model to show the importance of  
433 heparin-binding in human infection (Fig 9). Three determinant factors of EV-A71 virulence  
434 are virus entry, dissemination and neuroinvasion. Both strong and weak heparin binders infect  
435 humans at the same rate. Primary viremia is established upon virus entry in primary replication  
436 sites such as tonsils and oropharynx [15]. Strong heparin binders are readily removed from  
437 blood circulation due to their high affinity to heparin, thereby reducing the viremia level. Weak  
438 heparin binders are not adsorbed into tissues, but remain in the bloodstream, undergoing further

439 extraneural replication in skeletal muscles, giving rise to high viremia. Upon overcoming the  
440 immune system, the high viremia results in better replication and dissemination to skeletal  
441 muscles, and peripheral motor nerves, through which the virus invades the CNS by retrograde  
442 axonal transport [15, 108]. High viremia alone does not result in direct CNS invasion as the  
443 virus cannot traverse the BBB. The dynamic reversion between heparin-binding and weak  
444 heparin-binding phenotypes in viruses occurs due to the differing needs of the virus to bind to  
445 the highly-abundant GAGs in tissues and to disseminate widely. Many research questions  
446 however remain. What additional host factors could alter the heparin-binding phenotypes?  
447 Could the host immune responses influence the fate of the viruses if activated early enough  
448 before the high viremia stage?

449 In summary, we showed that weak heparin-binding EV-A71 is highly virulent in mice, in  
450 contrast with strong heparin binders which show higher replication *in vitro* due to culture  
451 adaptation. This study shows that weak heparin-binding EV-A71 is preferentially selected to  
452 disseminate via the bloodstream; in contrast, strong heparin-binding EV-A71 is adsorbed to  
453 peripheral tissues and rapidly cleared. The electrostatic surface charges at the VP1 capsid shape  
454 heparin-binding and hence EV-A71 virulence. Our findings provide the mechanistic action of  
455 heparin-dependent virulence, and have potential therapeutic implications for viruses which  
456 utilize heparin as an attachment receptor and are dependent on high viremia levels to cause  
457 infection.

458

## 459 **Materials and Methods**

### 460 **Ethics statement**

461 The animal experiments were carried out in accordance with the rules and guidelines of the  
462 Animal Experimental Unit (AEU) in University of Malaya. The protocols were reviewed and  
463 approved by the Institutional Animal Care and Use Committee of the Faculty of Medicine,  
464 University of Malaya (reference number: 2016-190908/R/TCW).

465

### 466 **Cell lines and viruses**

467 Human rhabdomyosarcoma (RD, ATCC no.: CCL-136) and human glioblastoma cells (U-  
468 87MG, ATCC no.: HTB-14) were propagated in Dulbecco's Modified Eagle's Medium  
469 (DMEM) (Life Technologies). Chinese hamster ovary cells (CHO-K1; ATCC no: CCL-61)  
470 were maintained in Kaighn's modification of Ham's F-12K nutrient mixture (Life  
471 Technologies). All cells were supplemented with 10% fetal bovine serum (FBS). Infected cells  
472 were maintained in media containing 2% FBS. All cells were maintained at 37°C in 5% CO<sub>2</sub>.

473 EV-A71 strain 41 (5865/SIN/000009, GenBank accession no. AF316321; subgenogroup B4)  
474 was used for construction of infectious clones using a DNA-launched strategy as reported  
475 previously [109]. Different mutations were incorporated into the EV-A71 infectious clone  
476 plasmid using Q5 high-fidelity DNA polymerase (NEB) PCR site-directed mutagenesis with  
477 primers listed in [Table S2](#). The purified PCR products were treated with T4 polynucleotide  
478 kinase, T4 ligase and *DpnI* (NEB) for 1 hour at room temperature. The ligation mixture was  
479 then transformed into *E. coli* XL-10 GOLD ultracompetent cells (Agilent Technologies). The  
480 plasmids were transfected into RD cells using Lipofectamine LTX (life Technologies) as  
481 reported previously [36].

482

## 483 **Evaluation of virus attachment in cell lines**

484 The binding efficiency of EV-A71 variants to RD, U-87MG and CHO-K1 cells were evaluated  
485 using cell-based ELISA. Each virus variant was inoculated in triplicate wells in different cell  
486 lines at MOI of 20 (in 100  $\mu$ l), and incubated for 1 hour at 4°C. Unbound viruses were washed  
487 away three times using cold PBS. The infected cells were then fixed with 4% paraformaldehyde  
488 for 20 minutes at room temperature. Antibody staining was performed using EV-A71  
489 monoclonal antibody MAB979 (Merck, USA; 1:2500 dilution in 1 % BSA) for 1 hour at 37°C.  
490 After three washes with PBS-T (0.05% Tween 20 in PBS), HRP-conjugated anti-mouse IgG  
491 antibody (Gene Tex, USA; 1:2000 dilution in 1% BSA) was added to each well for 1 hour at  
492 37°C. After a final wash, KPL TrueBlue peroxidase substrate (SeraCare, USA; 100  $\mu$ l/well)  
493 was added. After 10 min, the reaction was immediately stopped by adding in stop solution and  
494 the absorbance reading was measured at 450 nm.

495

## 496 **Binding of EV-A71 particles to immobilized heparin sepharose beads**

497 A binding assay was performed using columns with immobilized heparin sepharose beads as  
498 previously reported [36]. In brief, 200  $\mu$ l of heparin sepharose (Abcam, UK) was aliquoted into  
499 a Pierce Spin Cup with cellulose acetate filter (Thermo Scientific, USA). The heparin sepharose  
500 beads were washed twice with binding buffer (0.02 M Tris-HCl, 0.14 M NaCl, pH 7.4), before  
501 addition of each virus variant ( $1 \times 10^5$  PFU in 600  $\mu$ l). The columns containing viruses were  
502 incubated for 30 minutes at 4°C, and this was followed by centrifugation and 5 washing steps.  
503 The heparin-bound viruses were collected after eluted with elution buffer (0.02 M Tris-HCl,  
504 2M NaCl, pH 7.4). Both virus input and output fractions were quantitated using real-time PCR,  
505 and the virus binding efficiency was normalized by dividing the output viral RNA copies  
506 number over the input viral copies number.

507

## 508 **Evaluation of inhibitory effect of soluble heparin on EV-A71 variants**

509 To determine the inhibitory effect of soluble heparin on EV-A71 variants, a virus inactivation  
510 assay was performed as previously described [9]. In brief, viruses were incubated with 2.5

511 mg/ml of soluble heparin (Sigma, USA) for an hour at 37°C. The treated viruses were  
512 inoculated onto pre-seeded RD cells and incubated at 37°C. Two days later, the cell viability  
513 of each infected virus variants was measured using CellTiter 96 Aqueous One solution Cell  
514 Proliferation Assay (Promega, USA). The relative cell viability was calculated by normalizing  
515 the absorbance value of treated virus samples against untreated virus samples, as compared to  
516 the mock-infected samples.

517

### 518 **Mice infection experiments**

519 Groups of one-day old ICR suckling mice (n= 9 to 12) were obtained from AEU. Each group  
520 of suckling mice were either intraperitoneally or intracerebrally inoculated with  $1 \times 10^5$  PFU  
521 of each EV-A71 variant or PBS alone. All infected mice were monitored daily for weight  
522 change and health status up to 13 days post-infection. A clinical score was recorded using the  
523 following grades: 0, healthy; 1, weak or less active; 2, hunched posture and lethargy; 3, one-  
524 limb paralysis; 4, two-limb paralysis; 5, moribund or dead. Moribund mice were sacrificed and  
525 removed along with any mice found dead. Harvested mice organs were homogenized using  
526 hard tissue homogenizing mix (Omni International, USA). RNA was extracted from the  
527 homogenates with QIAamp viral RNA mini kit (Qiagen, Denmark). The viral loads in organs  
528 were determined using TaqMan fast virus 1-step master mix (ABI, USA). One step RT-PCR  
529 was also performed to amplify viral RNA from the organs using MyTaq One-Step RT-PCR kit  
530 (Bioline, UK) for Sanger sequencing or deep sequencing. Illumina Miseq (Illumina, USA)  
531 next-generation sequencing (NGS) was performed with 150 nucleotide paired end reads and  
532 average coverage of at least 20,000 reads. The NGS reads were analyzed using CLC Bio  
533 Genomic Workbench (Qiagen).

534 For the virus clearance assay, 3- to 4 week old ICR mice (weighing within 25-35g) were i.p.  
535 injected with ketamine/xylazine cocktail prior to infection. Anesthetized animals were then  
536 intravenously inoculated with  $5 \times 10^5$  PFU of each EV-A71 variant via the tail vein. At certain  
537 timepoints, blood was collected from anaesthetized mice through the retro-orbital plexus with  
538 the use of a sodium heparinized hematocrit capillary (Hirsschmann, Germany). The collected  
539 whole blood was then used for viral RNA quantitation.

540

## 541 **Immunohistochemistry**

542 Immunohistochemistry (IHC) were performed by the standard ENVISION technique as  
543 described previously [110]. Briefly, deparaffinised and rehydrated tissue sections were blocked  
544 using standard immunoperoxidase procedure before antigen retrieval (30 minutes, 99°C, Tris  
545 EDTA buffer with 0.05% Tween-20). Tissues were then incubated with rabbit polyclonal EV-  
546 A71 VP1 (GeneTex, USA) at 4°C overnight. After washing, tissues were then incubated with  
547 goat-anti rabbit HRP-conjugate (Dako, Denmark) for 30 minutes at room temperature. Tissues  
548 were stained using DAB (Dako) and counterstained with hematoxylin (Dako). The tissues were  
549 mounted using DPX (Dako) prior to examination under a light microscope. The negative  
550 control tissues for IHC included mock-infected ICR mice brain and hind-limb muscle tissues.  
551 Isotype control antibodies or normal rabbit immunoglobulin fractions (Dako) were also used  
552 to exclude non-specific staining.

553

## 554 **Electrostatic surface charge analysis of EV-A71 structure**

555 The EV-A71 structure was visualized using Chimera software (UCSF Chimera version 1.13.1,  
556 USA). Electrostatic surface potentials of virus capsid were analyzed using the ‘Coulombic  
557 surface coloring’ function in which the capsid residues were labelled with different colors  
558 based on their electrostatic charges. Positively-charged residues were colored blue while  
559 negatively-charged residues were colored red.

560

## 561 **Molecular docking simulation of EV-A71 VP1 and 12-mer heparin**

562 Molecular docking simulation of EV-A71 crystal structure (PDB ID: 4AED) was performed  
563 using CDOCKER (CHARMm-based DOCKER) [111], as previously described [36].

564

565 **Statistics**

566 All experiments were performed with at least two biological duplicates. Data are shown with  
567 error bars indicating standard deviations. Student's *t*-test was performed for all *in vitro*  
568 experiments as well as viral load quantitation from mice organs. Survival of mice was evaluated  
569 using Kaplan-Meier analysis. GraphPad Prism version 5.03 (GraphPad Software, USA) was  
570 used for statistical analyses with a *P* value of < 0.05 indicating significance.

571



## 572 **References**

- 573 1. NikNadia N, Sam IC, Rampal S, WanNorAmalina W, NurAtifah G, Verasahib K, et al. Cyclical  
574 patterns of hand, foot and mouth disease caused by Enterovirus A71 in Malaysia. *PLoS Negl Trop Dis*.  
575 2016;10(3):e0004562. Epub 2016/03/25. doi: 10.1371/journal.pntd.0004562. PubMed PMID:  
576 27010319; PubMed Central PMCID: PMC4806993.
- 577 2. Schmidt NJ, Lennette EH, Ho HH. An apparently new enterovirus isolated from patients with  
578 disease of the central nervous system. *J Infect Dis*. 1974;129(3):304-9. Epub 1974/03/01. PubMed  
579 PMID: 4361245.
- 580 3. Ooi MH, Wong SC, Lewthwaite P, Cardoso MJ, Solomon T. Clinical features, diagnosis, and  
581 management of enterovirus 71. *The Lancet Neurology*. 2010;9(11):1097-105. Epub 2010/10/23. doi:  
582 10.1016/s1474-4422(10)70209-x. PubMed PMID: 20965438.
- 583 4. McMinn PC. An overview of the evolution of enterovirus 71 and its clinical and public health  
584 significance. *FEMS microbiology reviews*. 2002;26(1):91-107. Epub 2002/05/15. doi: 10.1111/j.1574-  
585 6976.2002.tb00601.x. PubMed PMID: 12007645.
- 586 5. Brown BA, Pallansch MA. Complete nucleotide sequence of enterovirus 71 is distinct from  
587 poliovirus. *Virus Res*. 1995;39(2-3):195-205. Epub 1995/12/01. PubMed PMID: 8837884.
- 588 6. Shingler KL, Yoder JL, Carnegie MS, Ashley RE, Makhov AM, Conway JF, et al. The enterovirus  
589 71 A-particle forms a gateway to allow genome release: a CryoEM study of picornavirus uncoating.  
590 *PLOS Pathogens*. 2013;9(3):e1003240. doi: 10.1371/journal.ppat.1003240.
- 591 7. Yamayoshi S, Yamashita Y, Li J, Hanagata N, Minowa T, Takemura T, et al. Scavenger receptor  
592 B2 is a cellular receptor for enterovirus 71. *Nat Med*. 2009;15(7):798-801. Epub 2009/06/23. doi:  
593 10.1038/nm.1992. PubMed PMID: 19543282.
- 594 8. Nishimura Y, Shimojima M, Tano Y, Miyamura T, Wakita T, Shimizu H. Human P-selectin  
595 glycoprotein ligand-1 is a functional receptor for enterovirus 71. *Nat Med*. 2009;15(7):794-7. Epub  
596 2009/06/23. doi: 10.1038/nm.1961. PubMed PMID: 19543284.
- 597 9. Tan CW, Poh CL, Sam IC, Chan YF. Enterovirus 71 uses cell surface heparan sulfate  
598 glycosaminoglycan as an attachment receptor. *J Virol*. 2013;87(1):611-20. Epub 2012/10/26. doi:  
599 10.1128/JVI.02226-12. PubMed PMID: 23097443; PubMed Central PMCID: PMC3536405.
- 600 10. Yang F, Ren L, Xiong Z, Li J, Xiao Y, Zhao R, et al. Enterovirus 71 outbreak in the People's  
601 Republic of China in 2008. *J Clin Microbiol*. 2009;47(7):2351-2. Epub 2009/05/15. doi:  
602 10.1128/JCM.00563-09. PubMed PMID: 19439545; PubMed Central PMCID: PMC2708525.
- 603 11. Su PY, Liu YT, Chang HY, Huang SW, Wang YF, Yu CK, et al. Cell surface sialylation affects  
604 binding of enterovirus 71 to rhabdomyosarcoma and neuroblastoma cells. *BMC Microbiol*.  
605 2012;12:162. Epub 2012/08/03. doi: 10.1186/1471-2180-12-162. PubMed PMID: 22853823; PubMed  
606 Central PMCID: PMC3478995.

- 607 12. Yang B, Solakyildirim K, Chang Y, Linhardt RJ. Hyphenated techniques for the analysis of  
608 heparin and heparan sulfate. *Anal Bioanal Chem.* 2011;399(2):541-57. Epub 2010/09/21. doi:  
609 10.1007/s00216-010-4117-6. PubMed PMID: 20853165; PubMed Central PMCID: PMCPMC3235348.
- 610 13. Du N, Cong H, Tian H, Zhang H, Zhang W, Song L, et al. Cell surface vimentin is an attachment  
611 receptor for enterovirus 71. *J Virol.* 2014;88(10):5816-33. Epub 2014/03/14. doi: 10.1128/JVI.03826-  
612 13. PubMed PMID: 24623428; PubMed Central PMCID: PMCPMC4019121.
- 613 14. Su PY, Wang YF, Huang SW, Lo YC, Wang YH, Wu SR, et al. Cell surface nucleolin facilitates  
614 enterovirus 71 binding and infection. *J Virol.* 2015;89(8):4527-38. Epub 2015/02/13. doi:  
615 10.1128/JVI.03498-14. PubMed PMID: 25673703; PubMed Central PMCID: PMCPMC4442404.
- 616 15. Ong KC, Wong KT. Understanding enterovirus 71 neuropathogenesis and its impact on other  
617 neurotropic enteroviruses. *Brain Pathol.* 2015;25(5):614-24. Epub 2015/08/16. doi:  
618 10.1111/bpa.12279. PubMed PMID: 26276025.
- 619 16. Zhang Y, Cui W, Liu L, Wang J, Zhao H, Liao Y, et al. Pathogenesis study of enterovirus 71  
620 infection in rhesus monkeys. *Lab Invest.* 2011;91(9):1337-50. Epub 2011/05/11. doi:  
621 10.1038/labinvest.2011.82. PubMed PMID: 21555996.
- 622 17. Li Y, Zhu R, Qian Y, Deng J, Sun Y, Liu L, et al. Comparing Enterovirus 71 with Coxsackievirus  
623 A16 by analyzing nucleotide sequences and antigenicity of recombinant proteins of VP1s and VP4s.  
624 *BMC Microbiol.* 2011;11:246. Epub 2011/11/05. doi: 10.1186/1471-2180-11-246. PubMed PMID:  
625 22050722; PubMed Central PMCID: PMCPMC3217892.
- 626 18. Chang SC, Li WC, Chen GW, Tsao KC, Huang CG, Huang YC, et al. Genetic characterization of  
627 enterovirus 71 isolated from patients with severe disease by comparative analysis of complete  
628 genomes. *J Med Virol.* 2012;84(6):931-9. Epub 2012/04/14. doi: 10.1002/jmv.23287. PubMed PMID:  
629 22499017.
- 630 19. Zhang B, Wu X, Huang K, Li L, Zheng L, Wan C, et al. The variations of VP1 protein might be  
631 associated with nervous system symptoms caused by enterovirus 71 infection. *BMC Infect Dis.*  
632 2014;14:243. Epub 2014/06/03. doi: 10.1186/1471-2334-14-243. PubMed PMID: 24886383; PubMed  
633 Central PMCID: PMCPMC4101859.
- 634 20. Liu Y, Fu C, Wu S, Chen X, Shi Y, Zhou B, et al. A novel finding for enterovirus virulence from  
635 the capsid protein VP1 of EV71 circulating in mainland China. *Virus Genes.* 2014;48(2):260-72. Epub  
636 2014/01/21. doi: 10.1007/s11262-014-1035-2. PubMed PMID: 24442718.
- 637 21. Huang YP, Lin TL, Lin TH, Wu HS. Antigenic and genetic diversity of human enterovirus 71 from  
638 2009 to 2012, Taiwan. *PLoS One.* 2013;8(11):e80942. Epub 2013/12/19. doi:  
639 10.1371/journal.pone.0080942. PubMed PMID: 24348916; PubMed Central PMCID:  
640 PMCPMC3858369.
- 641 22. Chua BH, Phuektes P, Sanders SA, Nicholls PK, McMinin PC. The molecular basis of mouse  
642 adaptation by human enterovirus 71. *J Gen Virol.* 2008;89(Pt 7):1622-32. Epub 2008/06/19. doi:  
643 10.1099/vir.0.83676-0. PubMed PMID: 18559932.
- 644 23. Huang SW, Wang YF, Yu CK, Su IJ, Wang JR. Mutations in VP2 and VP1 capsid proteins increase  
645 infectivity and mouse lethality of enterovirus 71 by virus binding and RNA accumulation enhancement.

- 646 Virology. 2012;422(1):132-43. Epub 2011/11/15. doi: 10.1016/j.virol.2011.10.015. PubMed PMID:  
647 22078110.
- 648 24. Zaini Z, McMinn P. A single mutation in capsid protein VP1 (Q145E) of a genogroup C4 strain  
649 of human enterovirus 71 generates a mouse-virulent phenotype. J Gen Virol. 2012;93(Pt 9):1935-40.  
650 Epub 2012/06/01. doi: 10.1099/vir.0.043893-0. PubMed PMID: 22647370.
- 651 25. Zhu J, Chen N, Zhou S, Zheng K, Sun L, Zhang Y, et al. Severity of enterovirus A71 infection in a  
652 human SCARB2 knock-in mouse model is dependent on infectious strain and route. Emerg Microbes  
653 Infect. 2018;7(1):205. Epub 2018/12/07. doi: 10.1038/s41426-018-0201-3. PubMed PMID: 30518755;  
654 PubMed Central PMCID: PMC6281673.
- 655 26. Kataoka C, Suzuki T, Kotani O, Iwata-Yoshikawa N, Nagata N, Ami Y, et al. The role of VP1  
656 amino acid residue 145 of enterovirus 71 in viral fitness and pathogenesis in a cynomolgus monkey  
657 model. PLoS Pathog. 2015;11(7):e1005033. Epub 2015/07/17. doi: 10.1371/journal.ppat.1005033.  
658 PubMed PMID: 26181772; PubMed Central PMCID: PMC4504482.
- 659 27. Nishimura Y, Lee H, Hafenstein S, Kataoka C, Wakita T, Bergelson JM, et al. Enterovirus 71  
660 binding to PSGL-1 on leukocytes: VP1-145 acts as a molecular switch to control receptor interaction.  
661 PLoS Pathog. 2013;9(7):e1003511. Epub 2013/08/13. doi: 10.1371/journal.ppat.1003511. PubMed  
662 PMID: 23935488; PubMed Central PMCID: PMC3723564.
- 663 28. Reddi HV, Lipton HL. Heparan sulfate mediates infection of high-neurovirulence Theiler's  
664 viruses. J Virol. 2002;76(16):8400-7. Epub 2002/07/23. PubMed PMID: 12134043; PubMed Central  
665 PMCID: PMC155119.
- 666 29. Lee E, Lobigs M. Mechanism of virulence attenuation of glycosaminoglycan-binding variants  
667 of Japanese Encephalitis Virus and Murray Valley Encephalitis Virus. 2002;76(10):4901-11. doi:  
668 10.1128/JVI.76.10.4901-4911.2002 %J Journal of Virology.
- 669 30. Lee E, Hall RA, Lobigs M. Common E protein determinants for attenuation of  
670 glycosaminoglycan-binding variants of Japanese encephalitis and West Nile viruses. J Virol.  
671 2004;78(15):8271-80. Epub 2004/07/16. doi: 10.1128/JVI.78.15.8271-8280.2004. PubMed PMID:  
672 15254199; PubMed Central PMCID: PMC446099.
- 673 31. Lee E, Lobigs M. E protein domain III determinants of yellow fever virus 17D vaccine strain  
674 enhance binding to glycosaminoglycans, impede virus spread, and attenuate virulence. J Virol.  
675 2008;82(12):6024-33. Epub 2008/04/11. doi: 10.1128/JVI.02509-07. PubMed PMID: 18400851;  
676 PubMed Central PMCID: PMC2395160.
- 677 32. Mandl CW, Kroschewski H, Allison SL, Kofler R, Holzmann H, Meixner T, et al. Adaptation of  
678 tick-borne encephalitis virus to BHK-21 cells results in the formation of multiple heparan sulfate  
679 binding sites in the envelope protein and attenuation in vivo. J Virol. 2001;75(12):5627-37. Epub  
680 2001/05/18. doi: 10.1128/JVI.75.12.5627-5637.2001. PubMed PMID: 11356970; PubMed Central  
681 PMCID: PMC114275.
- 682 33. Byrnes AP, Griffin DE. Large-plaque mutants of Sindbis virus show reduced binding to heparan  
683 sulfate, heightened viremia, and slower clearance from the circulation. J Virol. 2000;74(2):644-51.  
684 Epub 2000/01/07. PubMed PMID: 10623725; PubMed Central PMCID: PMC111583.

- 685 34. Gardner CL, Ebel GD, Ryman KD, Klimstra WB. Heparan sulfate binding by natural eastern  
686 equine encephalitis viruses promotes neurovirulence. *Proc Natl Acad Sci U S A*. 2011;108(38):16026-  
687 31. Epub 2011/09/08. doi: 10.1073/pnas.1110617108. PubMed PMID: 21896745; PubMed Central  
688 PMCID: PMC3179095.
- 689 35. Gardner CL, Choi-Nurvitadhi J, Sun C, Bayer A, Hritz J, Ryman KD, et al. Natural variation in the  
690 heparan sulfate binding domain of the eastern equine encephalitis virus E2 glycoprotein alters  
691 interactions with cell surfaces and virulence in mice. *J Virol*. 2013;87(15):8582-90. Epub 2013/05/31.  
692 doi: 10.1128/JVI.00937-13. PubMed PMID: 23720725; PubMed Central PMCID: PMC3719831.
- 693 36. Tan CW, Sam IC, Lee VS, Wong HV, Chan YF. VP1 residues around the five-fold axis of  
694 enterovirus A71 mediate heparan sulfate interaction. *Virology*. 2017;501:79-87. Epub 2016/11/23. doi:  
695 10.1016/j.virol.2016.11.009. PubMed PMID: 27875780.
- 696 37. Xu Y, Ma S, Zhu L, Huang Z, Chen L, Xu Y, et al. Clinically isolated enterovirus A71 subgenogroup  
697 C4 strain with lethal pathogenicity in 14-day-old mice and the application as an EV-A71 mouse  
698 infection model. *Antiviral Res*. 2017;137:67-75. Epub 2016/11/20. doi:  
699 10.1016/j.antiviral.2016.11.008. PubMed PMID: 27864074.
- 700 38. Fujii K, Sudaka Y, Takashino A, Kobayashi K, Kataoka C, Suzuki T, et al. VP1 amino acid residue  
701 145 of enterovirus 71 is a key residue for its receptor attachment and resistance to neutralizing  
702 antibody during cynomolgus monkey infection. *J Virol*. 2018. Epub 2018/06/01. doi:  
703 10.1128/JVI.00682-18. PubMed PMID: 29848582; PubMed Central PMCID: PMC6052295.
- 704 39. Meng T, Kwang J. Attenuation of human enterovirus 71 high-replication-fidelity variants in  
705 AG129 mice. *J Virol*. 2014;88(10):5803-15. Epub 2014/03/14. doi: 10.1128/jvi.00289-14. PubMed  
706 PMID: 24623423; PubMed Central PMCID: PMC4019108.
- 707 40. Sadeghipour S, Bek EJ, McMinn PC. Ribavirin-resistant mutants of human enterovirus 71  
708 express a high replication fidelity phenotype during growth in cell culture. *J Virol*. 2013;87(3):1759-69.  
709 Epub 2012/11/24. doi: 10.1128/jvi.02139-12. PubMed PMID: 23175376; PubMed Central PMCID:  
710 PMC3554166.
- 711 41. Vignuzzi M, Wendt E, Andino R. Engineering attenuated virus vaccines by controlling  
712 replication fidelity. *Nat Med*. 2008;14(2):154-61. Epub 2008/02/05. doi: 10.1038/nm1726. PubMed  
713 PMID: 18246077.
- 714 42. Acevedo A, Woodman A, Arnold JJ, Yeh MT, Evans D, Cameron CE, et al. Genetic  
715 recombination of poliovirus facilitates subversion of host barriers to infection. 2018:273060. Preprint.  
716 Available from: doi: 10.1101/273060 %J bioRxiv. Cited 24 Feb 2019.
- 717 43. Zaini Z, Phuektes P, McMinn P. Mouse adaptation of a sub-genogroup B5 strain of human  
718 enterovirus 71 is associated with a novel lysine to glutamic acid substitution at position 244 in protein  
719 VP1. *Virus Res*. 2012;167(1):86-96. Epub 2012/05/12. doi: 10.1016/j.virusres.2012.04.009. PubMed  
720 PMID: 22575826.
- 721 44. Caine EA, Moncla LH, Ronderos MD, Friedrich TC, Osorio JE. A single mutation in the VP1 of  
722 enterovirus 71 is responsible for increased virulence and neurotropism in adult interferon-deficient  
723 mice. 2016;90(19):8592-604. doi: 10.1128/JVI.01370-16 %J Journal of Virology.

- 724 45. Pfeiffer JK, Kirkegaard K. Increased fidelity reduces poliovirus fitness and virulence under  
725 selective pressure in mice. *PLOS Pathogens*. 2005;1(2):e11. doi: 10.1371/journal.ppat.0010011.
- 726 46. Vignuzzi M, Stone JK, Arnold JJ, Cameron CE, Andino R. Quasispecies diversity determines  
727 pathogenesis through cooperative interactions in a viral population. *Nature*. 2006;439(7074):344-8.  
728 Epub 2005/12/04. doi: 10.1038/nature04388. PubMed PMID: 16327776.
- 729 47. Zaini Z, Phuektes P, McMinn P. A reverse genetic study of the adaptation of human enterovirus  
730 71 to growth in Chinese hamster ovary cell cultures. *Virus Res*. 2012;165(2):151-6. Epub 2012/03/13.  
731 doi: 10.1016/j.virusres.2012.02.009. PubMed PMID: 22406130.
- 732 48. Zhu W, Li J, Liang G. How does cellular heparan sulfate function in viral pathogenicity? *Biomed  
733 Environ Sci*. 2011;24(1):81-7. Epub 2011/03/29. doi: 10.3967/0895-3988.2011.01.011. PubMed PMID:  
734 21440844.
- 735 49. Liu J, Dong W, Quan X, Ma C, Qin C, Zhang L. Transgenic expression of human P-selectin  
736 glycoprotein ligand-1 is not sufficient for enterovirus 71 infection in mice. *Arch Virol*. 2012;157(3):539-  
737 43. Epub 2011/12/22. doi: 10.1007/s00705-011-1198-2. PubMed PMID: 22187102.
- 738 50. Fujii K, Nagata N, Sato Y, Ong KC, Wong KT, Yamayoshi S, et al. Transgenic mouse model for  
739 the study of enterovirus 71 neuropathogenesis. *Proc Natl Acad Sci U S A*. 2013;110(36):14753-8. Epub  
740 2013/08/21. doi: 10.1073/pnas.1217563110. PubMed PMID: 23959904; PubMed Central PMCID:  
741 PMC3767555.
- 742 51. Lin YW, Yu SL, Shao HY, Lin HY, Liu CC, Hsiao KN, et al. Human SCARB2 transgenic mice as an  
743 infectious animal model for enterovirus 71. *PLoS One*. 2013;8(2):e57591. Epub 2013/03/02. doi:  
744 10.1371/journal.pone.0057591. PubMed PMID: 23451246; PubMed Central PMCID:  
745 PMC3581494.
- 746 52. Yamayoshi S, Koike S. Identification of a human SCARB2 region that is important for  
747 enterovirus 71 binding and infection. 2011;85(10):4937-46. doi: 10.1128/JVI.02358-10 %J *Journal of  
748 Virology*.
- 749 53. Miyamura K, Nishimura Y, Abo M, Wakita T, Shimizu H. Adaptive mutations in the genomes of  
750 enterovirus 71 strains following infection of mouse cells expressing human P-selectin glycoprotein  
751 ligand-1. *The Journal of general virology*. 2011;92(Pt 2):287-91. doi: 10.1099/vir.0.022418-0. PubMed  
752 PMID: 20943886.
- 753 54. Chen YC, Yu CK, Wang YF, Liu CC, Su IJ, Lei HY. A murine oral enterovirus 71 infection model  
754 with central nervous system involvement. *J Gen Virol*. 2004;85(Pt 1):69-77. Epub 2004/01/14. doi:  
755 10.1099/vir.0.19423-0. PubMed PMID: 14718621.
- 756 55. Bernard KA, Klimstra WB, Johnston RE. Mutations in the E2 glycoprotein of Venezuelan equine  
757 encephalitis virus confer heparan sulfate interaction, low morbidity, and rapid clearance from blood  
758 of mice. *Virology*. 2000;276(1):93-103. Epub 2000/10/07. doi: 10.1006/viro.2000.0546. PubMed PMID:  
759 11021998.
- 760 56. Kobayashi K, Sudaka Y, Takashino A, Imura A, Fujii K, Koike S. Amino acid variation at VP1-145  
761 of enterovirus 71 determines attachment receptor usage and neurovirulence in human scavenger

- 762 receptor B2 transgenic mice. *J Virol.* 2018. Epub 2018/06/01. doi: 10.1128/JVI.00681-18. PubMed  
763 PMID: 29848584; PubMed Central PMCID: PMC6052303.
- 764 57. Wang X, Li S-H, Zhu L, Nian Q-G, Yuan S, Gao Q, et al. Near-atomic structure of Japanese  
765 encephalitis virus reveals critical determinants of virulence and stability. *Nature Communications.*  
766 2017;8(1):14. doi: 10.1038/s41467-017-00024-6.
- 767 58. Cheng HY, Huang YC, Yen TY, Hsia SH, Hsieh YC, Li CC, et al. The correlation between the  
768 presence of viremia and clinical severity in patients with enterovirus 71 infection: a multi-center  
769 cohort study. *BMC Infect Dis.* 2014;14:417. Epub 2014/07/30. doi: 10.1186/1471-2334-14-417.  
770 PubMed PMID: 25069383; PubMed Central PMCID: PMC4133623.
- 771 59. Feng M, Guo S, Fan S, Zeng X, Zhang Y, Liao Y, et al. The preferential infection of astrocytes by  
772 enterovirus 71 plays a key role in the viral neurogenic pathogenesis. *Frontiers in cellular and infection*  
773 *microbiology.* 2016;6:192-. doi: 10.3389/fcimb.2016.00192. PubMed PMID: 28066727.
- 774 60. Tan SH, Wong KT, Ong KC. Enterovirus 71 can directly infect the brainstem via cranial nerves  
775 and infection can be ameliorated by passive immunization. *Journal of Neuropathology & Experimental*  
776 *Neurology.* 2014;73(11):999-1008. doi: 10.1097/NEN.000000000000122 %J Journal of  
777 *Neuropathology & Experimental Neurology.*
- 778 61. Ong KC, Badmanathan M, Devi S, Leong KL, Cardoso MJ, Wong KT. Pathologic characterization  
779 of a murine model of human enterovirus 71 encephalomyelitis. *J Neuropathol Exp Neurol.*  
780 2008;67(6):532-42. Epub 2008/06/04. doi: 10.1097/NEN.0b013e31817713e7. PubMed PMID:  
781 18520772.
- 782 62. Chen CS, Yao YC, Lin SC, Lee YP, Wang YF, Wang JR, et al. Retrograde axonal transport: a major  
783 transmission route of enterovirus 71 in mice. *J Virol.* 2007;81(17):8996-9003. Epub 2007/06/15. doi:  
784 10.1128/jvi.00236-07. PubMed PMID: 17567704; PubMed Central PMCID: PMC1951457.
- 785 63. Racaniello VR. One hundred years of poliovirus pathogenesis. *Virology.* 2006;344(1):9-16. doi:  
786 <https://doi.org/10.1016/j.virol.2005.09.015>.
- 787 64. Lancaster KZ, Pfeiffer JK. Limited trafficking of a neurotropic virus through inefficient  
788 retrograde axonal transport and the type I interferon response. *PLOS Pathogens.* 2010;6(3):e1000791.  
789 doi: 10.1371/journal.ppat.1000791.
- 790 65. Couderc T, Delpyroux F, Le Blay H, Blondel B. Mouse adaptation determinants of poliovirus  
791 type 1 enhance viral uncoating. *J Virol.* 1996;70(1):305-12. Epub 1996/01/01. PubMed PMID: 8523541;  
792 PubMed Central PMCID: PMC189818.
- 793 66. Rincon V, Rodriguez-Huete A, Lopez-Arguello S, Ibarra-Molero B, Sanchez-Ruiz JM, Harmsen  
794 MM, et al. Identification of the structural basis of thermal lability of a virus provides a rationale for  
795 improved vaccines. *Structure.* 2014;22(11):1560-70. Epub 2014/10/14. doi: 10.1016/j.str.2014.08.019.  
796 PubMed PMID: 25308865.
- 797 67. Bordo D, Argos P. Suggestions for "safe" residue substitutions in site-directed mutagenesis. *J*  
798 *Mol Biol.* 1991;217(4):721-9. Epub 1991/02/20. PubMed PMID: 2005621.

- 799 68. Cohen FE. The Statistics of Sequence Similarity Scores. NCBI. 11 June 2006. Available from:  
800 <https://www.ncbi.nlm.nih.gov/BLAST/tutorial/Altschul-1.html> Cited 29th March 2019.
- 801 69. Zhang YX, Huang YM, Li QJ, Li XY, Zhou YD, Guo F, et al. A highly conserved amino acid in VP1  
802 regulates maturation of enterovirus 71. *PLoS Pathog.* 2017;13(9):e1006625. Epub 2017/09/25. doi:  
803 10.1371/journal.ppat.1006625. PubMed PMID: 28938017; PubMed Central PMCID: PMC5634653.
- 804 70. Tseligka ED, Sobo K, Stoppini L, Cagno V, Abdul F, Piuz I, et al. A VP1 mutation acquired during  
805 an enterovirus 71 disseminated infection confers heparan sulfate binding ability and modulates ex  
806 vivo tropism. *PLOS Pathogens.* 2018;14(8):e1007190. doi: 10.1371/journal.ppat.1007190.
- 807 71. Cordey S, Petty TJ, Schibler M, Martinez Y, Gerlach D, van Belle S, et al. Identification of site-  
808 specific adaptations conferring increased neural cell tropism during human enterovirus 71 infection.  
809 *PLoS Pathog.* 2012;8(7):e1002826. Epub 2012/08/23. doi: 10.1371/journal.ppat.1002826. PubMed  
810 PMID: 22910880; PubMed Central PMCID: PMC3406088.
- 811 72. Huang SW, Huang YH, Tsai HP, Kuo PH, Wang SM, Liu CC, et al. A selective bottleneck shapes  
812 the evolutionary mutant spectra of enterovirus A71 during viral dissemination in humans. *J Virol.*  
813 2017;91(23). Epub 2017/09/22. doi: 10.1128/JVI.01062-17. PubMed PMID: 28931688; PubMed  
814 Central PMCID: PMC5686718.
- 815 73. Yuan S, Li G, Wang Y, Gao Q, Wang Y, Cui R, et al. Identification of positively charged residues  
816 in enterovirus 71 capsid protein VP1 essential for production of infectious particles. *J Virol.*  
817 2016;90(2):741-52. Epub 2015/10/30. doi: 10.1128/JVI.02482-15. PubMed PMID: 26512078; PubMed  
818 Central PMCID: PMC4702679.
- 819 74. Brown BA, Oberste MS, Alexander JP, Jr., Kennett ML, Pallansch MA. Molecular epidemiology  
820 and evolution of enterovirus 71 strains isolated from 1970 to 1998. *J Virol.* 1999;73(12):9969-75. Epub  
821 1999/11/13. PubMed PMID: 10559310; PubMed Central PMCID: PMC113047.
- 822 75. Chang GH, Lin L, Luo YJ, Cai LJ, Wu XY, Xu HM, et al. Sequence analysis of six enterovirus 71  
823 strains with different virulences in humans. *Virus Res.* 2010;151(1):66-73. Epub 2010/04/20. doi:  
824 10.1016/j.virusres.2010.04.001. PubMed PMID: 20398708.
- 825 76. Chen JF, Zhang RS, Ou XH, Chen FM, Sun BC. The role of enterovirus 71 and coxsackievirus A  
826 strains in a large outbreak of hand, foot, and mouth disease in 2012 in Changsha, China. *Int J Infect*  
827 *Dis.* 2014;28:17-25. Epub 2014/09/23. doi: 10.1016/j.ijid.2014.07.024. PubMed PMID: 25236389.
- 828 77. Ding NZ, Wang XM, Sun SW, Song Q, Li SN, He CQ. Appearance of mosaic enterovirus 71 in the  
829 2008 outbreak of China. *Virus Res.* 2009;145(1):157-61. Epub 2009/06/23. doi:  
830 10.1016/j.virusres.2009.06.006. PubMed PMID: 19540282.
- 831 78. Duong V, Mey C, Eloit M, Zhu H, Danet L, Huang Z, et al. Molecular epidemiology of human  
832 enterovirus 71 at the origin of an epidemic of fatal hand, foot and mouth disease cases in Cambodia.  
833 *Emerg Microbes Infect.* 2016;5(9):e104. Epub 2016/09/22. doi: 10.1038/emi.2016.101. PubMed PMID:  
834 27651091; PubMed Central PMCID: PMC5113052.
- 835 79. Ganorkar NN, Patil PR, Tikute SS, Gopalkrishna V. Genetic characterization of enterovirus  
836 strains identified in Hand, Foot and Mouth Disease (HFMD): Emergence of B1c, C1 subgenotypes, E2

- 837 sublineage of CVA16, EV71 and CVA6 strains in India. *Infect Genet Evol.* 2017;54:192-9. Epub  
838 2017/06/05. doi: 10.1016/j.meegid.2017.05.024. PubMed PMID: 28577914.
- 839 80. Herrero LJ, Lee CS, Hurrelbrink RJ, Chua BH, Chua KB, McMinn PC. Molecular epidemiology of  
840 enterovirus 71 in peninsular Malaysia, 1997-2000. *Arch Virol.* 2003;148(7):1369-85. Epub 2003/06/27.  
841 doi: 10.1007/s00705-003-0100-2. PubMed PMID: 12827466.
- 842 81. Jiang B, Zhang J, You X, Dong C, Cheng X, Dai X, et al. Diagnosis of hand, foot, and mouth  
843 disease caused by EV71 and other enteroviruses by a one-step, single tube, duplex RT-PCR. *J Med Virol.*  
844 2012;84(11):1803-8. Epub 2012/09/22. doi: 10.1002/jmv.23391. PubMed PMID: 22997084.
- 845 82. Li J, Huo X, Dai Y, Yang Z, Lei Y, Jiang Y, et al. Evidences for intertypic and intratypic  
846 recombinant events in EV71 of hand, foot and mouth disease during an epidemic in Hubei Province,  
847 China, 2011. *Virus Res.* 2012;169(1):195-202. Epub 2012/08/28. doi: 10.1016/j.virusres.2012.07.028.  
848 PubMed PMID: 22922556.
- 849 83. Li R, Zou Q, Chen L, Zhang H, Wang Y. Molecular analysis of virulent determinants of  
850 enterovirus 71. *PLoS One.* 2011;6(10):e26237. Epub 2011/11/01. doi: 10.1371/journal.pone.0026237.  
851 PubMed PMID: 22039449; PubMed Central PMCID: PMC3198388.
- 852 84. Mao Q, Dong C, Li X, Gao Q, Guo Z, Yao X, et al. Comparative analysis of the immunogenicity  
853 and protective effects of inactivated EV71 vaccines in mice. *PLoS One.* 2012;7(9):e46043. Epub  
854 2012/10/03. doi: 10.1371/journal.pone.0046043. PubMed PMID: 23029378; PubMed Central PMCID:  
855 PMC3460965.
- 856 85. McMinn P, Lindsay K, Perera D, Chan HM, Chan KP, Cardoso MJ. Phylogenetic analysis of  
857 enterovirus 71 strains isolated during linked epidemics in Malaysia, Singapore, and Western Australia.  
858 *J Virol.* 2001;75(16):7732-8. Epub 2001/07/20. doi: 10.1128/jvi.75.16.7732-7738.2001. PubMed PMID:  
859 11462047; PubMed Central PMCID: PMC3115010.
- 860 86. Miyamura K, Nishimura Y, Abo M, Wakita T, Shimizu H. Adaptive mutations in the genomes of  
861 enterovirus 71 strains following infection of mouse cells expressing human P-selectin glycoprotein  
862 ligand-1. *J Gen Virol.* 2011;92(Pt 2):287-91. Epub 2010/10/15. doi: 10.1099/vir.0.022418-0. PubMed  
863 PMID: 20943886; PubMed Central PMCID: PMC3081077.
- 864 87. Mizuta K, Abiko C, Murata T, Matsuzaki Y, Itagaki T, Sanjoh K, et al. Frequent importation of  
865 enterovirus 71 from surrounding countries into the local community of Yamagata, Japan, between  
866 1998 and 2003. *J Clin Microbiol.* 2005;43(12):6171-5. Epub 2005/12/08. doi: 10.1128/jcm.43.12.6171-  
867 6175.2005. PubMed PMID: 16333123; PubMed Central PMCID: PMC1317214.
- 868 88. Tan CY, Gonfrier G, Ninove L, Zandotti C, Dubot-Peres A, de Lamballerie X, et al. Screening and  
869 detection of human enterovirus 71 infection by a real-time RT-PCR assay in Marseille, France, 2009-  
870 2011. *Clin Microbiol Infect.* 2012;18(4):E77-80. Epub 2012/02/16. doi: 10.1111/j.1469-  
871 0691.2012.03769.x. PubMed PMID: 22332991.
- 872 89. Tan le V, Tuyen NT, Thanh TT, Ngan TT, Van HM, Sabanathan S, et al. A generic assay for whole-  
873 genome amplification and deep sequencing of enterovirus A71. *J Virol Methods.* 2015;215-216:30-6.  
874 Epub 2015/02/24. doi: 10.1016/j.jviromet.2015.02.011. PubMed PMID: 25704598; PubMed Central  
875 PMCID: PMC4374682.



- 876 90. Wang LC, Tang SQ, Li YM, Zhao HL, Dong CH, Cui PF, et al. A comparison of the biological  
877 characteristics of EV71 C4 subtypes from different epidemic strains. *Virol Sin.* 2010;25(2):98-106. Epub  
878 2010/10/21. doi: 10.1007/s12250-010-3102-8. PubMed PMID: 20960306.
- 879 91. Wen HL, Si LY, Yuan XJ, Hao SB, Gao F, Chu FL, et al. Complete genome sequencing and analysis  
880 of six enterovirus 71 strains with different clinical phenotypes. *Virol J.* 2013;10:115. Epub 2013/04/13.  
881 doi: 10.1186/1743-422x-10-115. PubMed PMID: 23577963; PubMed Central PMCID:  
882 PMCPMC3669102.
- 883 92. Wu WH, Kuo TC, Lin YT, Huang SW, Liu HF, Wang J, et al. Molecular epidemiology of  
884 enterovirus 71 infection in the central region of Taiwan from 2002 to 2012. *PLoS One.*  
885 2013;8(12):e83711. Epub 2014/01/07. doi: 10.1371/journal.pone.0083711. PubMed PMID: 24391812;  
886 PubMed Central PMCID: PMCPMC3877097.
- 887 93. Wu Y, Yeo A, Phoon MC, Tan EL, Poh CL, Quak SH, et al. The largest outbreak of hand; foot and  
888 mouth disease in Singapore in 2008: the role of enterovirus 71 and coxsackievirus A strains. *Int J Infect*  
889 *Dis.* 2010;14(12):e1076-81. Epub 2010/10/19. doi: 10.1016/j.ijid.2010.07.006. PubMed PMID:  
890 20952237.
- 891 94. Wu Z, Yang F, Zhao R, Zhao L, Guo D, Jin Q. Identification of small interfering RNAs which  
892 inhibit the replication of several Enterovirus 71 strains in China. *J Virol Methods.* 2009;159(2):233-8.  
893 Epub 2009/06/06. doi: 10.1016/j.jviromet.2009.04.002. PubMed PMID: 19490979.
- 894 95. Xu J, Wang F, Zhao D, Liu J, Su H, Wang B. Sequence analysis-based characterization and  
895 identification of neurovirulence-associated variants of 36 EV71 strains from China. *J Med Virol.*  
896 2018;90(8):1310-7. Epub 2018/04/01. doi: 10.1002/jmv.25081. PubMed PMID: 29603282.
- 897 96. Yoke-Fun C, AbuBakar S. Phylogenetic evidence for inter-typic recombination in the  
898 emergence of human enterovirus 71 subgenotypes. *BMC microbiology.* 2006;6:74. Epub 2006/08/31.  
899 doi: 10.1186/1471-2180-6-74. PubMed PMID: 16939656; PubMed Central PMCID: PMCPMC1569848.
- 900 97. Yu H, Chen W, Chang H, Tang R, Zhao J, Gan L, et al. Genetic analysis of the VP1 region of  
901 enterovirus 71 reveals the emergence of genotype A in central China in 2008. *Virus Genes.*  
902 2010;41(1):1-4. Epub 2010/03/23. doi: 10.1007/s11262-010-0472-9. PubMed PMID: 20306124.
- 903 98. Zhang Y, Wang J, Guo W, Wang H, Zhu S, Wang D, et al. Emergence and transmission pathways  
904 of rapidly evolving evolutionary branch C4a strains of human enterovirus 71 in the Central Plain of  
905 China. *PLoS One.* 2011;6(11):e27895. Epub 2011/11/30. doi: 10.1371/journal.pone.0027895. PubMed  
906 PMID: 22125635; PubMed Central PMCID: PMCPMC3220707.
- 907 99. Zhang Y, Zhu Z, Yang W, Ren J, Tan X, Wang Y, et al. An emerging recombinant human  
908 enterovirus 71 responsible for the 2008 outbreak of hand foot and mouth disease in Fuyang city of  
909 China. *Virol J.* 2010;7:94. Epub 2010/05/13. doi: 10.1186/1743-422x-7-94. PubMed PMID: 20459851;  
910 PubMed Central PMCID: PMCPMC2885340.
- 911 100. Zhang YC, Jiang SW, Gu WZ, Hu AR, Lu CT, Liang XY, et al. Clinicopathologic features and  
912 molecular analysis of enterovirus 71 infection: report of an autopsy case from the epidemic of hand,  
913 foot and mouth disease in China. *Pathol Int.* 2012;62(8):565-70. Epub 2012/07/26. doi:  
914 10.1111/j.1440-1827.2012.02837.x. PubMed PMID: 22827767.

- 915 101. Zhou X, Zhu Q, Xia W, He F, Hu M, Ni X, et al. Molecular epidemiology of an outbreak of hand,  
916 foot, and mouth disease associated with subgenotype C4a of enterovirus A71 in Nanchang, China in  
917 2014. *J Med Virol.* 2015;87(12):2154-8. Epub 2015/06/11. doi: 10.1002/jmv.24288. PubMed PMID:  
918 26058813.
- 919 102. Lum LC, Wong KT, Lam SK, Chua KB, Goh AY, Lim WL, et al. Fatal enterovirus 71  
920 encephalomyelitis. *J Pediatr.* 1998;133(6):795-8. Epub 1998/12/08. PubMed PMID: 9842048.
- 921 103. Gao LD, Hu SX, Zhang H, Luo KW, Liu YZ, Xu QH, et al. Correlation analysis of EV71 detection  
922 and case severity in hand, foot, and mouth disease in the Hunan Province of China. *PLoS One.*  
923 2014;9(6):e100003. Epub 2014/06/19. doi: 10.1371/journal.pone.0100003. PubMed PMID: 24941257;  
924 PubMed Central PMCID: PMC4062471.
- 925 104. Sabanathan S, Tan LV, Thwaites L, Wills B, Qui PT, Rogier van Doorn H. Enterovirus 71 related  
926 severe hand, foot and mouth disease outbreaks in South-East Asia: current situation and ongoing  
927 challenges. 2014;68(6):500-2. doi: 10.1136/jech-2014-203836 %J *Journal of Epidemiology and*  
928 *Community Health.*
- 929 105. Xing W, Liao Q, Viboud C, Zhang J, Sun J, Wu JT, et al. Hand, foot, and mouth disease in China,  
930 2008-12: an epidemiological study. *Lancet Infect Dis.* 2014;14(4):308-18. Epub 2014/02/04. doi:  
931 10.1016/s1473-3099(13)70342-6. PubMed PMID: 24485991; PubMed Central PMCID:  
932 PMC4035015.
- 933 106. Zhang J, Sun J, Chang Z, Zhang W, Wang Z, Feng Z. Characterization of hand, foot, and mouth  
934 disease in China between 2008 and 2009. *Biomed Environ Sci.* 2011;24(3):214-21. Epub 2011/07/26.  
935 doi: 10.3967/0895-3988.2011.03.002. PubMed PMID: 21784305.
- 936 107. McMinn PC. An overview of the evolution of enterovirus 71 and its clinical and public health  
937 significance. *FEMS microbiology reviews.* 2002;26(1):91-107. doi: 10.1111/j.1574-  
938 6976.2002.tb00601.x %J *FEMS Microbiology Reviews.*
- 939 108. Chen C-S, Yao Y-C, Lin S-C, Lee Y-P, Wang Y-F, Wang J-R, et al. Retrograde Axonal Transport: a  
940 Major Transmission Route of Enterovirus 71 in Mice. 2007;81(17):8996-9003. doi: 10.1128/JVI.00236-  
941 07 %J *Journal of Virology.*
- 942 109. Tan CW, Tee HK, Lee MH, Sam IC, Chan YF. Enterovirus A71 DNA-launched infectious clone as  
943 a robust reverse genetic tool. *PLoS One.* 2016;11(9):e0162771. Epub 2016/09/13. doi:  
944 10.1371/journal.pone.0162771. PubMed PMID: 27617744; PubMed Central PMCID:  
945 PMC45019408.
- 946 110. Kammerer U, Kapp M, Gassel AM, Richter T, Tank C, Dietl J, et al. A new rapid  
947 immunohistochemical staining technique using the EnVision antibody complex. *J Histochem Cytochem.*  
948 2001;49(5):623-30. Epub 2001/04/17. doi: 10.1177/002215540104900509. PubMed PMID: 11304800.
- 949 111. Momany FA, Rone R. Validation of the general purpose QUANTA 3.2/CHARMm force field %J  
950 *J. Comput. Chem.* 1992;13(7):888-900. doi: 10.1002/jcc.540130714.
- 951 112. Patabendige A, Skinner RA, Morgan L, Abbott NJ. A detailed method for preparation of a  
952 functional and flexible blood-brain barrier model using porcine brain endothelial cells. *Brain Res.*

953 2013;1521:16-30. Epub 2013/04/23. doi: 10.1016/j.brainres.2013.04.006. PubMed PMID: 23603406;  
954 PubMed Central PMCID: PMC3694295.

955 113. Patabendige A, Skinner RA, Abbott NJ. Establishment of a simplified in vitro porcine blood-  
956 brain barrier model with high transendothelial electrical resistance. Brain Res. 2013;1521:1-15. Epub  
957 2012/07/14. doi: 10.1016/j.brainres.2012.06.057. PubMed PMID: 22789905; PubMed Central PMCID:  
958 PMC3694297.

959

## 960 **Figure legends**

### 961 **Fig 1. *In vitro* characterization of constructed EV-A71 variants.**

962 (A) Schematic illustration of the EV-A71 genome and the infectious clone constructs. Different  
963 amino acids were substituted at VP1-98, VP1-145 and VP2-149 sites (labeled in bold), with  
964 reference to the wild type strain EQK. (B) The clone-derived EV-A71 variants were propagated  
965 in RD cells and showed comparable plaque morphologies. (C) Relative cell binding of EV-  
966 A71 variants were measured using a virus attachment assay in RD, U-87MG and CHO-K1  
967 cells. The relative cell binding value was determined by absorbance ratio of each variant over  
968 WT virus. (D) The binding affinity of EV-A71 variants to heparin sepharose beads was  
969 analyzed. (E) Inhibitory effect of heparin on EV-A71 variants was evaluated by pretreating the  
970 viruses with soluble heparin before infection of RD cells. Results are presented as mean  $\pm$  SD  
971 (n=3). Error bars indicate standard deviations from triplicates. Statistical significances are  
972 denoted with \* $P < 0.05$ , \*\* $P < 0.01$  as compared to the WT.

973

### 974 **Fig 2. Clinical scores and survival rates of suckling mice infected with EV-A71 variants.**

975 One-day old suckling mice (n=9-12) were inoculated with  $1 \times 10^5$  PFU of different EV-A71  
976 variants by i.p. injection. (A) A litter of mock-infected mice was used as a control group  
977 receiving PBS injection. The clinical scores and percentage of survival of the infected mice  
978 groups were monitored daily for 13 days. The severity of clinical symptoms was scored as  
979 follows: 0, healthy; 1, weak or less active; 2 hunched posture and lethargy; 3, one-limb  
980 paralysis; 4, two-limb paralysis; 5, moribund or dead. Significant differences compared to EQK  
981 are labelled as \* ( $P < 0.05$ ) and \*\*\* $P < 0.001$ ). EQK, KQK and KEK curves are identical to  
982 that of the mock-infected group. The VP1 sequence chromatograms of EQI (B) and EEI (C)  
983 populations isolated from infected animal organs are shown, highlighting VP1-98, VP1-145  
984 and VP1-244 (note that VP2-149 is not shown). The emergence of E244 virus isolated from  
985 brains and limbs of EQI-infected moribund mice are shown.

986

987

988 **Fig 3. Characterization of virulent phenotype of EEI and EQI-K244E<sup>+</sup> variants**

989 (A) EV-A71 variants collected from the brain homogenates of dead infected mice were  
990 compared to clone-derived variants for heparin-binding properties. (B) One-day old suckling  
991 mice (n=8-12) were infected with EEI, EQI-K244E<sup>+</sup> and EQI<sup>+</sup> through i.p. injection. A control  
992 group receiving PBS injection was also included. The clinical scores and percentage of survival  
993 are shown over 13 days post-infection. Significant differences compared to WT are labelled as  
994 \*\* ( $P < 0.01$ ) and \*\*\* $P (< 0.001)$ . Tissue samples of mice which succumbed to EEI and EQI-  
995 K244E<sup>+</sup> infection were subjected to IHC and H&E staining. Virus antigen was seen in muscle  
996 cells (C), along with increased inflammatory infiltrates. In brains (D), antigen-positive neurons  
997 were seen in the midbrain (representative image from an EQI-K244E<sup>+</sup>-infected brain) and pons  
998 (representative image from an EEI-infected brain), with severe inflammation in the cortex  
999 shown by H&E staining. Magnification for IHC staining: X40; H&E staining: X20.

1000

1001 **Fig 4. Viral load quantitation from harvested organs and viremia level induced by EV-**  
1002 **A71 variants.**

1003 (A) At selected time points, EQI, EEI and EQI-K244E<sup>+</sup>-infected mice (n=5) were sacrificed  
1004 and viral loads were determined from harvested hind limbs and brains using qRT-PCR.  
1005 Significant differences between viral variants are labelled as \*\* ( $P < 0.01$ ) and \*\*\* ( $P < 0.001$ ).  
1006 (B) Virus clearance from blood was quantitated using qRT-PCR following intravenous  
1007 inoculation of EQK (WT), EEI, EQI or EQI-K244E<sup>+</sup> into 3-4 week-old mice. The virus titers  
1008 were quantitated at selected timepoints up to 30 minutes. Significant differences between EQK  
1009 and EQI-K244E<sup>+</sup> are labelled as \* ( $P < 0.05$ ) and \*\* ( $P < 0.01$ ).

1010

1011 **Fig 5. High fidelity and recombination deficiency restrict emergence of the VP1-K244E**  
1012 **mutation, resulting in attenuation of EQI**

1013 The RdRp of EQI was modified to harbor the high fidelity G64R and L123F mutations (HF)  
1014 or the recombination-deficient Y276H mutation (Rec<sup>-</sup>) and virulence was analyzed in mice. (A)  
1015 EV-A71 subgenomic replicon (EV-A71 Nluc Rep), EV-A71 Nluc Rep-HF (HF mutations are

1016 indicated by yellow triangles), EV-A71 Nluc-Rep-Rec<sup>-</sup> (Rec<sup>-</sup> mutation is denoted by orange  
1017 triangle) and truncated replicon (EV-A71 Nluc Rep-del3D) were transfected separately into  
1018 RD cells. (B) Luciferase activities were determined up to 8 hours post-transfection. Significant  
1019 differences between replicon variants and WT are labelled as \*\*\* ( $P < 0.001$ ). (C) Virulence  
1020 of EQI-HF, EQI-Rec<sup>-</sup> and EQI following i.p. infection of mice was measured by clinical scores  
1021 and percentage of survival. EQI-HF and EQI-Rec<sup>-</sup> curves are identical to that of the mock-infected  
1022 PBS group. Significant difference between viral variants and EQI is labelled as \*\* ( $P < 0.01$ ).

1023

1024 **Fig 6. EQI virulence was attenuated when inoculated intracerebrally.**

1025 A dose of  $1 \times 10^5$  PFU of each EV-A71 variant was administered intracerebrally into one-day  
1026 old suckling mice. Clinical scores and percentage of survival over 13 days are shown.  
1027 Significant differences between viral variants and WT are labelled as \*\*\* ( $P < 0.001$ ).

1028

1029 **Fig 7. Sequential emergence of K244E mutation involves intermediate transition variants.**

1030 One-day old suckling mice were intraperitoneally injected with  $1 \times 10^5$  PFU of EQI. (A) At  
1031 days 3 and 7 post-infection, mice were euthanized to harvest their hind limb muscles and brains.  
1032 At day 9 post-infection, two moribund mice were sacrificed for processing (highlighted in red).  
1033 At the end of the experiment (day 11 post-infection), the remaining three healthy mice were  
1034 sacrificed and categorized as 'survivors'. The boxes indicate RT-PCR results for EV-A71 for  
1035 each muscle and brain sample. A total of eight samples were positive, comprising four muscle  
1036 samples from day 7 post-infection, and two muscle and brain samples from day 9 post-infection.  
1037 (B) NGS results showing the frequency of different variants at the VP1-145 and VP1-244 sites.  
1038 Variant frequencies lower than 0.1% are indicated with #. Noted that 7 dpi-M5 sample was  
1039 excluded from analysis due to poor sequencing coverage detected.

1040

1041 **Fig 8. Comparison of electrostatic surface properties of the EV-A71 structure**

1042 The analyzed amino acid residues are labelled in different colors in the EV-A71 capsid

1043 pentamer structure (PDB ID: 4AED). (A) The front views of the EV-A71 pentamer are  
1044 displayed along with a magnified view of the five-fold axis using Chimera 1.10.1. (B)  
1045 Electrostatic surface properties of EQI, EEI and EQI-K244E variants were examined.  
1046 Electrostatic charges are contoured from red (-5 kcal/mol·e, negatively-charged) to blue (+5  
1047 kcal/mol·e, positively-charged). Magnified views of the five-fold axis are shown for each  
1048 variant. Total interaction energy (C) and individual interaction energy of residues (D) within a  
1049 4Å radius of EV-A71 variants and VP1-244 variants docked to heparin were evaluated. Total  
1050 interaction energy (E) and individual interaction energy of residues (F) within a 4Å radius of  
1051 other mutations detected from NGS docked to heparin were examined.

1052

1053 **Fig 9. Hypothesized model of EV-A71 heparin-dependent pathogenesis in human.**

1054 Three major factors are responsible for EV-A71 virulence determination, namely virus entry,  
1055 peripheral dissemination and neuroinvasion. (A) Both strong and weak heparin binders infect  
1056 humans at the same rate, using the same inoculation route and receptor. (B) Viremia is  
1057 established upon virus entry. Strong heparin binders are more readily removed from the blood  
1058 circulation by binding to peripheral tissues due to their high affinity to heparin. Meanwhile,  
1059 weak heparin binders give rise to higher viremia with better dissemination to other organs. (C)  
1060 Neuroinvasion occurs when virus travels from peripheral motor nerves to the CNS via  
1061 retrograde axonal transport.

1062

1063 **Supporting information**

1064 **S1 Fig. Comparison of viral loads from muscles and brain in mice infected through the**  
1065 **i.c. route.**

1066 One-day old suckling mice (n=3) were infected with EEI through i.c. route of administration.  
1067 At day 4 post-infection, muscles and brains were harvested and viral loads were quantitated  
1068 using qRT-PCR. Significant comparisons are labelled \*\*\* ( $P < 0.001$ ).

1069

1070 **S2 Fig. Effects of EV-A71 exposure on a porcine *in vitro* BBB model.**

1071 Illustration of the porcine *in vitro* BBB model which simulates the movement of virus particles  
1072 through an *in vivo* BBB, in which the luminal side represents the blood capillary while the  
1073 abluminal compartment represents the brain (A). The *in vitro* model was exposed to different  
1074 EV-A71 variants with titer of  $1 \times 10^5$  PFU. The BBB permeability induced by EV-A71 variants  
1075 were assessed in terms of transendothelial electrical resistance (TEER), with a greater reduction  
1076 of TEER indicating greater permeability of BBB through tight junction leakages. The TEER  
1077 was recorded at 2 hours (B) and 6 hours post-exposure (C) along with non-infected cell controls  
1078 (white bars) and normalized with TEER values measured before virus exposure. Results are  
1079 presented as mean  $\pm$  SD (n=6). Significant differences between viral variants and WT (black  
1080 bars) are labelled as \* ( $P < 0.05$ ) and \*\* ( $P < 0.01$ ), using the Student's *t* test.

1081

1082 **S3 Fig. Structural modelling of EQI-K244E variant and root mean square fluctuation**  
1083 **analysis of different EV-A71 variants.**

1084 (A) Structural modelling of VP1 amino acid residues of EQI-K244E (left panel). Each  
1085 important amino acid is labelled with different colors: VP1-E244 in red, VP1-K242 in green,  
1086 VP1-L97 in orange and VP1-N104 in magenta. Note that VP1-E145 is not visible from this  
1087 angle. The surface of EQI-K244E (right panel) is displayed corresponding to the structural  
1088 model. (B) Root mean square fluctuation (RMSF) value of VP1 and VP2 amino acids are



1089 displayed for different variants. VP1 comprises residues 1-297 whereas VP2 consists of  
1090 residues 298-542. BC, EF and GH loops of VP1 are labelled accordingly.

1091

1092 **S1 Table. Comparison of EV-A71 isolate sequences of primary specimens and passaged**  
1093 **isolates.**

1094 Strong heparin binders (denoted with asterisks) were more frequently identified from  
1095 sequencing of passaged EV-A71 than from direct sequencing of primary specimens, suggesting  
1096 that the virus isolates have undergone heparin-binding adaptation in tissue culture ( $P < 0.00001$ ,  
1097 chi-square test).

1098

1099 **S2 Table. Primer sequences used for RT-PCR and qRT-PCR.**

1100 Primer sets used for EV-A71 VP1 sequencing and qRT-PCR are shown.

1101

1102 **S1 Text. Establishment of *in vitro* blood-brain barrier model**

1103 Primary porcine brain endothelial cells (PBECs) were cultured as reported previously with  
1104 slight modifications [112, 113]. To set up *in vitro* blood-brain barrier (BBB) model, the PBECs  
1105 were seeded onto Corning Transwell inserts at a density of  $1 \times 10^5$  cells/cm<sup>2</sup>. Upon cell  
1106 confluency, the culture medium was changed to a serum-free medium containing  
1107 hydrocortisone (550 nM). The cells were treated with CPT-cAMP (250  $\mu$ M) and RO-20-1724  
1108 (17.5  $\mu$ M) for approximately 24 hours to induce BBB differentiation, followed by measurement  
1109 of transendothelial electrical resistance (TEER).

1110 TEER of the PBEC monolayer was measured using a STX-100C chopstick electrode pair  
1111 connected to an EVOM meter (World Precision Instruments Inc., Sarasota) as an indicator for

1112 BBB tight junction function. The first measurement was conducted approximately 24 hours  
1113 post CPT-cAMP and RO-20-1724 treatment, and prior to virus exposure. TEER of a blank  
1114 filter insert without cells was subtracted from measured TEER of cell monolayers, and the  
1115 values multiplied by surface area of the filter insert (1.12 cm<sup>2</sup>) to give the final unit of  $\Omega$ .cm<sup>2</sup>.  
1116 All monolayers used for this study showed TEER above 100  $\Omega$ .cm<sup>2</sup>.

1117 EV-A71 variants were added to the luminal ('blood-facing') compartment i.e. the filter inserts,  
1118 and the filter inserts was incubated at 37°C. After 1-hour incubation, medium containing virus  
1119 samples was removed and replaced with fresh serum-free medium with added hydrocortisone  
1120 (550 nM), and the inserts were returned to the incubator. Subsequently, TEER was measured  
1121 at 2 and 6 hour post-exposure. At each time point, samples were aliquoted from the luminal  
1122 and abluminal ('brain-facing') compartments for qRT-PCR quantitation. Mock infected  
1123 controls were included for comparison.

1124

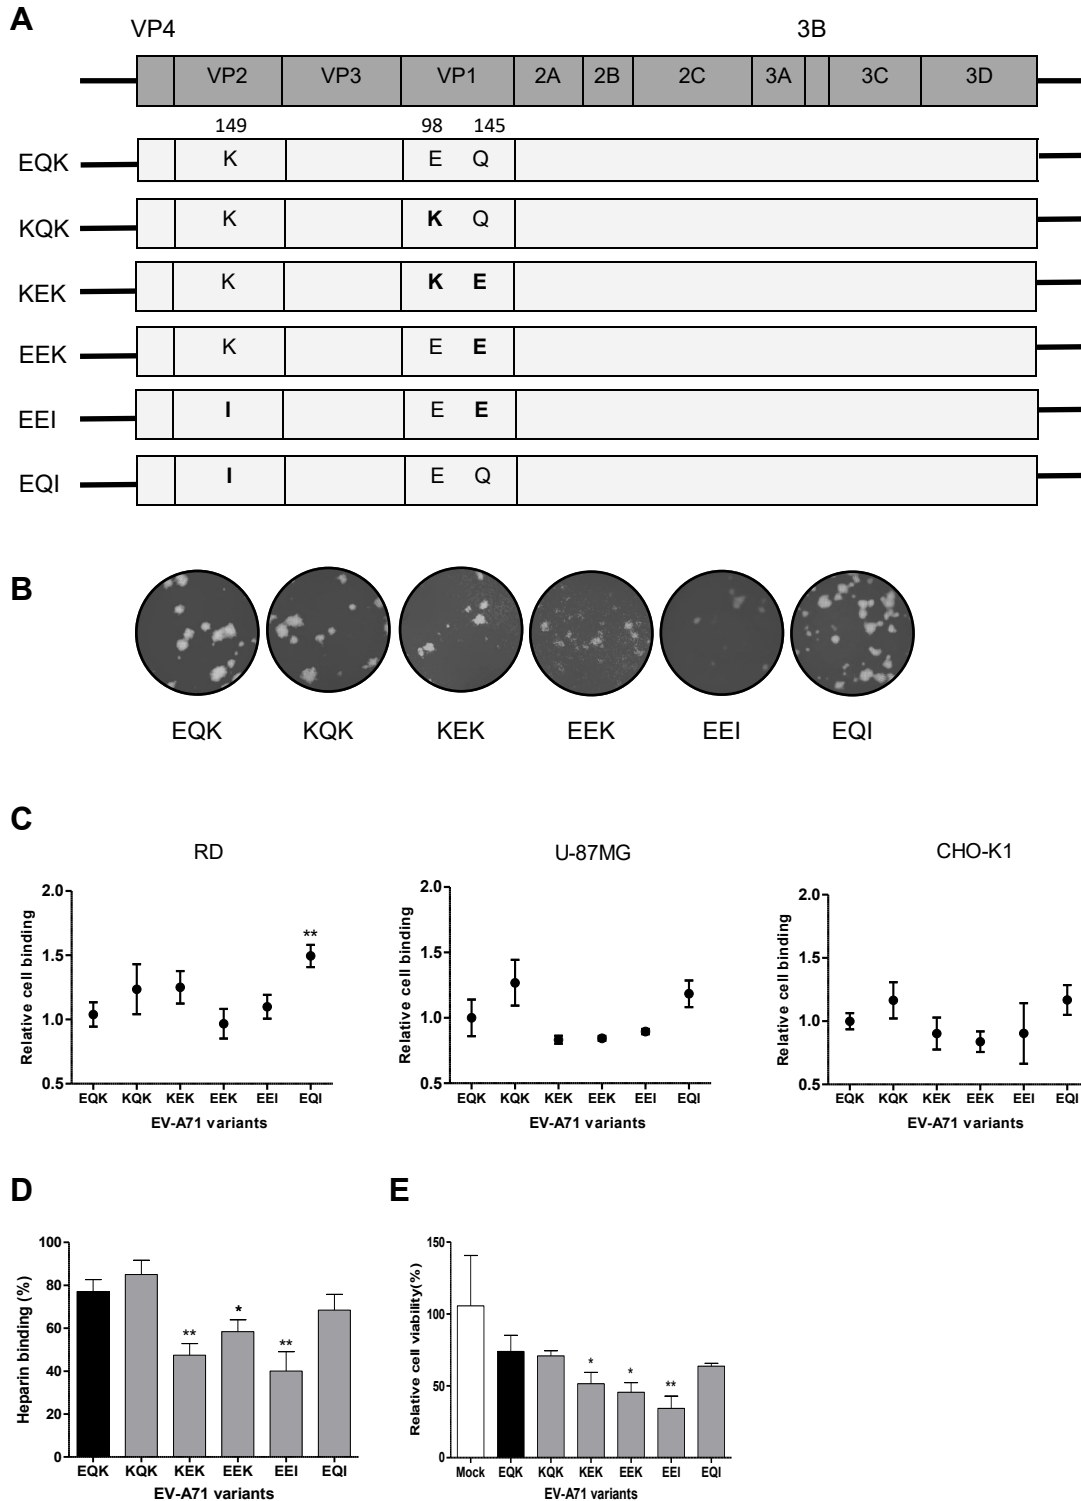

**Fig 1. *In vitro* characterization of constructed EV-A71 variants.**

(A) Schematic illustration of the EV-A71 genome and the infectious clone constructs. Different amino acids were substituted at VP1-98, VP1-145 and VP2-149 sites (labeled in bold), with reference to the wild type strain EQK. (B) The clone-derived EV-A71 variants were propagated in RD cells and showed comparable plaque morphologies. (C) Relative cell binding of EV-A71 variants were measured using a virus attachment assay in RD, U-87MG and CHO-K1 cells. The relative cell binding value was determined by absorbance ratio of each variant over WT virus. (D) The binding affinity of EV-A71 variants to heparin sepharose beads was analyzed. (E) Inhibitory effect of heparin on EV-A71 variants was evaluated by pre-treating the viruses with soluble heparin before infection of RD cells. Results are presented as mean  $\pm$  SD (n=3). Error bars indicate standard deviations from triplicates. Statistical significances are denoted with \* $P < 0.05$ , \*\* $P < 0.01$  as compared to the WT.

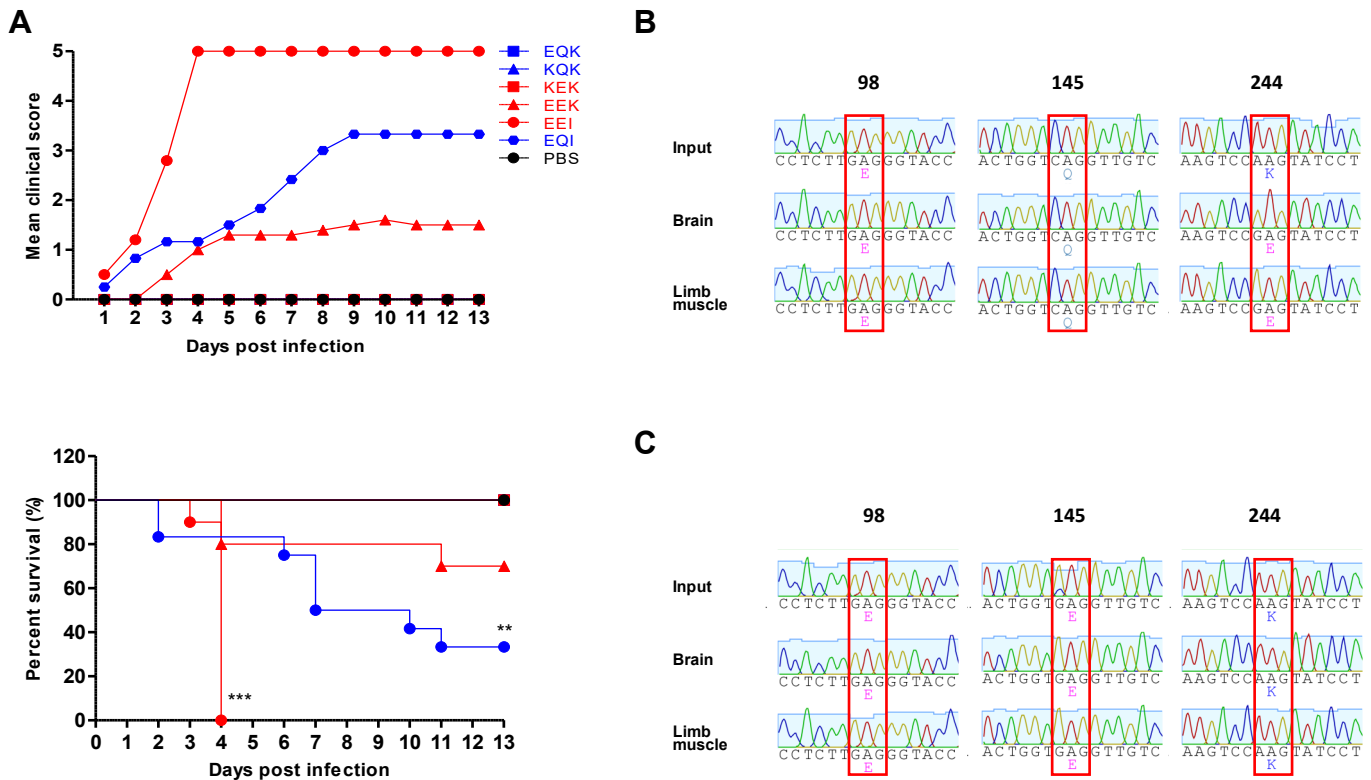

**Fig 2 . Clinical scores and survival rates of suckling mice infected with EV-A71 variants.**

One-day old suckling mice ( $n=9-12$ ) were inoculated with  $1 \times 10^5$  PFU of different EV-A71 variants by i.p. injection. (A) A litter of mock-infected mice was used as a control group receiving PBS injection. The clinical scores and percentage of survival of the infected mice groups were monitored daily for 13 days. The severity of clinical symptoms was scored as follows: 0, healthy; 1, weak or less active; 2 hunched posture and lethargy; 3, one-limb paralysis; 4, two-limb paralysis; 5, moribund or dead. Significant differences compared to EQK are labelled \*\* ( $P < 0.01$ ) and \*\*\* ( $P < 0.001$ ). EQK, KQK and KEK curves are identical to that of the mock-infected group. The VP1 sequence chromatograms of EQI (B) and EEI (C) populations isolated from infected animal organs are shown, highlighting VP1-98, VP1-145 and VP1-244 (note that VP2-149 is not shown). The emergence of E244 virus isolated from brains and limbs of EQI-infected moribund mice are shown.

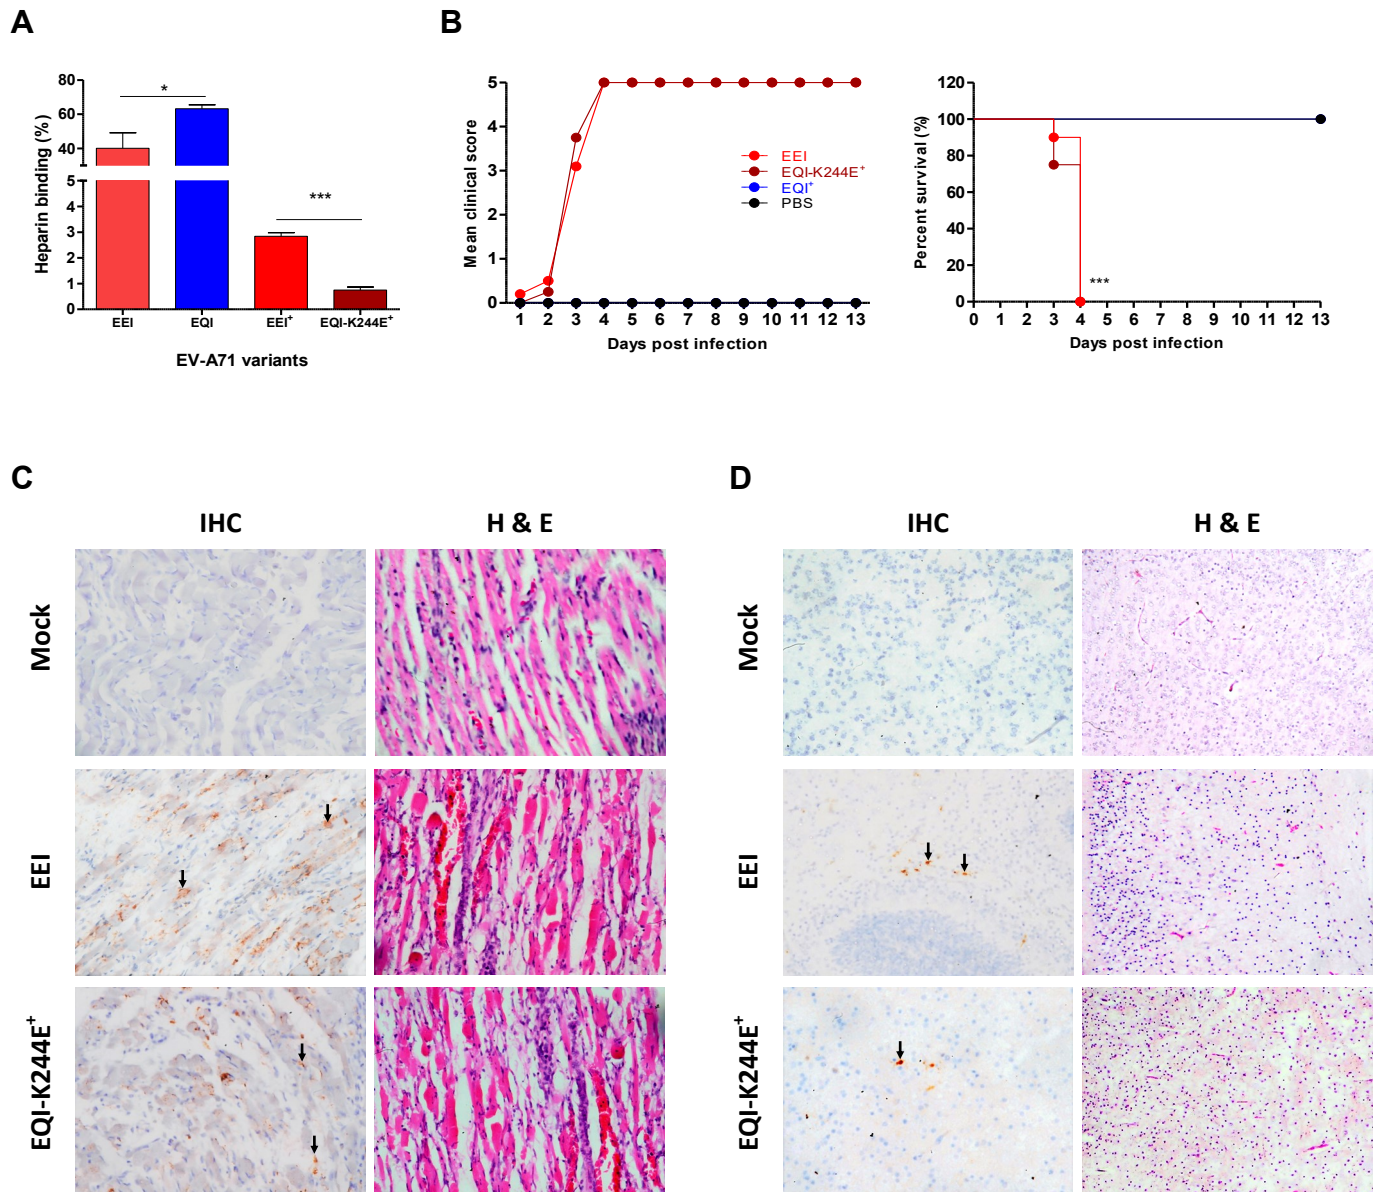

**Fig 3. Characterization of virulent phenotype of EEI and EQI-K244E<sup>+</sup> variants**

(A) EV-A71 variants collected from the brain homogenates of dead infected mice were compared to clone-derived variants for heparin-binding properties. (B) One-day old suckling mice (n=8-12) were infected with EEI, EQI-K244E<sup>+</sup> and EQI<sup>+</sup> through i.p. injection. A control group receiving PBS injection was also included. The clinical scores and percentage of survival are shown over 13 days post-infection. Significant differences compared to WT are labelled as \* ( $P < 0.05$ ) and \*\*\* $P < 0.001$ ). Tissue samples of mice which succumbed to EEI and EQI-K244E<sup>+</sup> infection were subjected to IHC and H&E staining. Virus antigen was seen in muscle cells (C), along with increased inflammatory infiltrates. In brains (D), antigen-positive neurons were seen in the midbrain (representative image from an EQI-K244E<sup>+</sup>-infected brain) and pons (representative image from an EEI-infected brain), with severe inflammation in the cortex shown by H&E staining. Magnification for IHC staining: X40; H&E staining: X20.

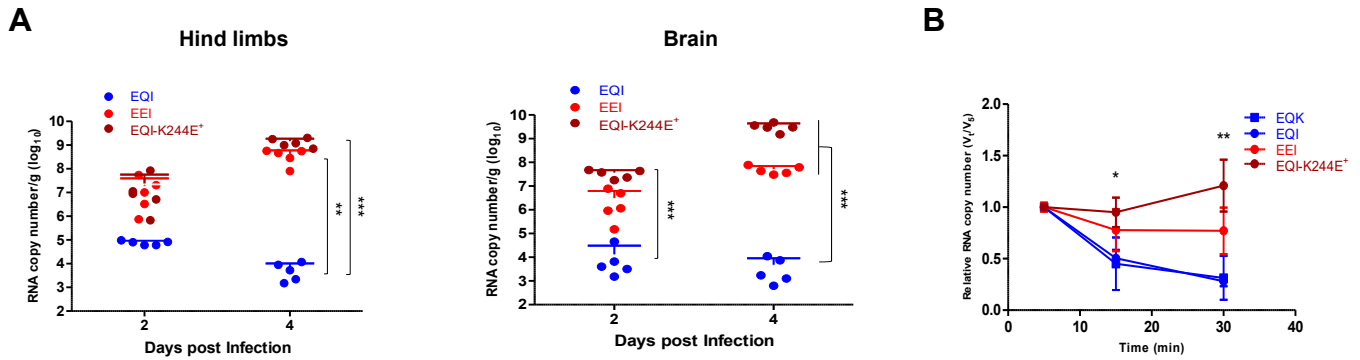

**Fig 4. Viral load quantitation from harvested organs and viremia level induced by EV-A71 variants.**

(A) At selected time points, EQI, EEI and EQI-K244E<sup>+</sup>-infected mice (n=5) were sacrificed and viral loads were determined from harvested hind limbs and brains using qRT-PCR. Significant differences between viral variants are labelled as \*\* ( $P < 0.01$ ) and \*\*\* ( $P < 0.001$ ). (B) Virus clearance from blood was quantitated using qRT-PCR following intravenous inoculation of EQK (WT), EEI, EQI or EQI-K244E<sup>+</sup> into 3-4 week-old mice. The virus titers were collected at selected timepoints up to 30 minutes. Significant differences between EQK and EQI-K244E<sup>+</sup> are labelled as \* ( $P < 0.05$ ) and \*\* ( $P < 0.01$ ).

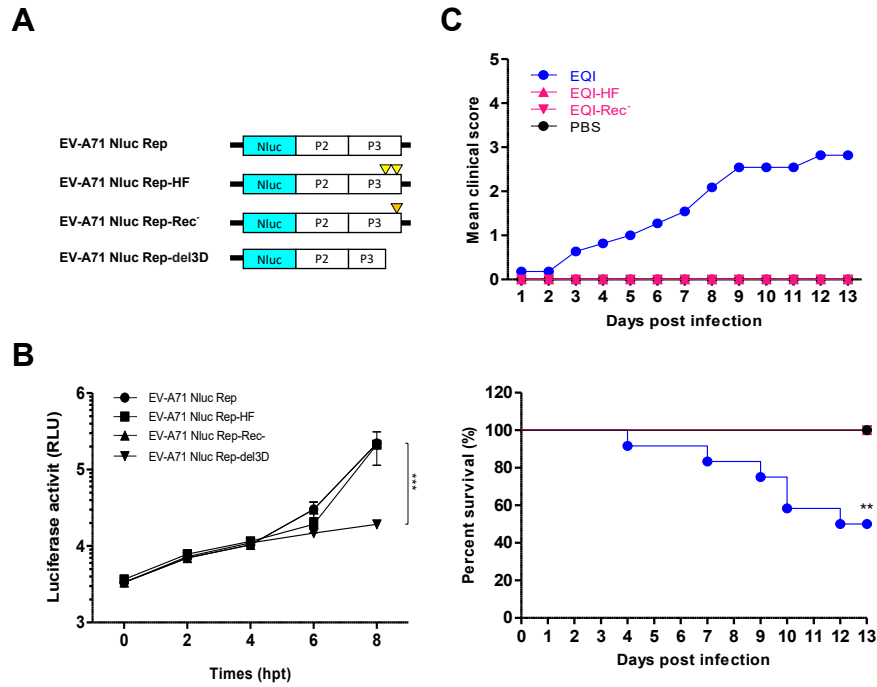

**Fig 5. High fidelity and recombination deficiency restrict emergence of the VP1-K244E mutation, resulting in attenuation of EQI**

The RdRp of EQI was modified to harbor the high fidelity G64R and L123F mutations (HF) or the recombination-deficient Y276H mutation (Rec<sup>-</sup>) and virulence was analyzed in mice. (A) EV-A71 subgenomic replicon (EV-A71 Nluc Rep), EV-A71 Nluc Rep-HF (HF mutations are indicated by yellow triangles), EV-A71 Nluc-Rep-Rec<sup>-</sup> (Rec<sup>-</sup> mutation is denoted by orange triangle) and truncated replicon (EV-A71 Nluc Rep-del3D) were transfected separately into RD cells. (B) Luciferase activities were determined up to 8 hours post-transfection. Significant differences between replicon variants and WT are labelled as \*\*\* ( $P < 0.001$ ). (C) Virulence of EQI-HF, EQI-Rec<sup>-</sup> and EQI following i.p. infection of mice was measured by clinical scores and percentage of survival. EQI-HF and EQI-Rec<sup>-</sup> curves are identical to that of the mock-infected PBS group. Significant difference between viral variants and EQI is labelled as \*\* ( $P < 0.01$ ).

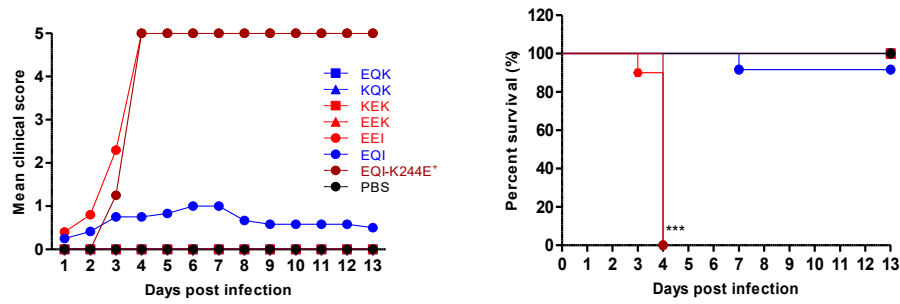

**Fig 6. EQI virulence was attenuated when inoculated intracerebrally.**

A dose of  $1 \times 10^5$  PFU of each EV-A71 variant was administered intracerebrally into one-day old suckling mice. Clinical scores and percentage of survival over 13 days are shown. Significant differences between viral variants and WT are labelled as \*\*\* ( $P < 0.001$ ).



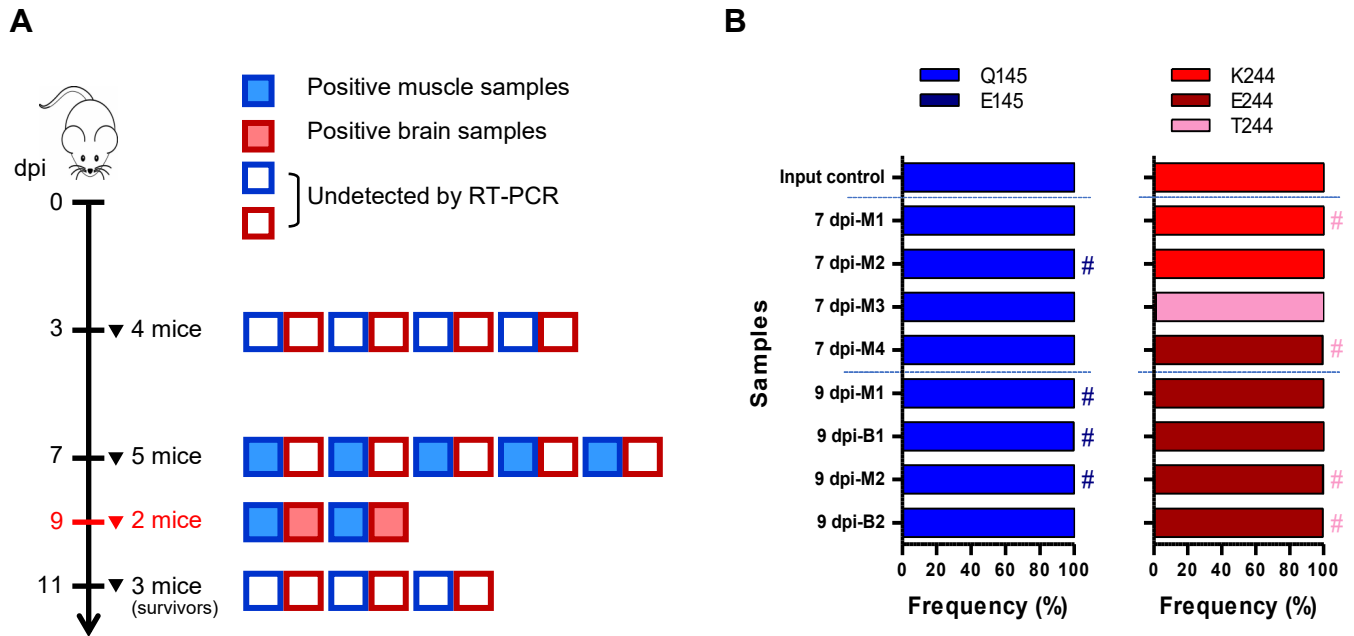

**Fig 7 . Sequential emergence of K244E mutation involves intermediate transition variants.**

One-day old suckling mice were intraperitoneally injected with  $1 \times 10^5$  PFU of EQI. (A) At days 3 and 7 post-infection, mice were euthanized to harvest their hind limb muscles and brains. At day 9 post-infection, two moribund mice were sacrificed for processing (highlighted in red). At the end of the experiment (day 11 post-infection), the remaining three healthy mice were sacrificed and categorized as ‘survivors’. The boxes indicate RT-PCR results for EV-A71 for each muscle and brain sample. A total of eight samples were positive, comprising four muscle samples from day 7 post-infection, and two muscle and brain samples from day 9 post-infection. (B) NGS results showing the frequency of different variants at the VP1-145 and VP1-244 sites. Variant frequencies lower than 0.1% are indicated with #. Noted that 7 dpi-M5 sample was excluded from analysis due to poor sequencing coverage detected.

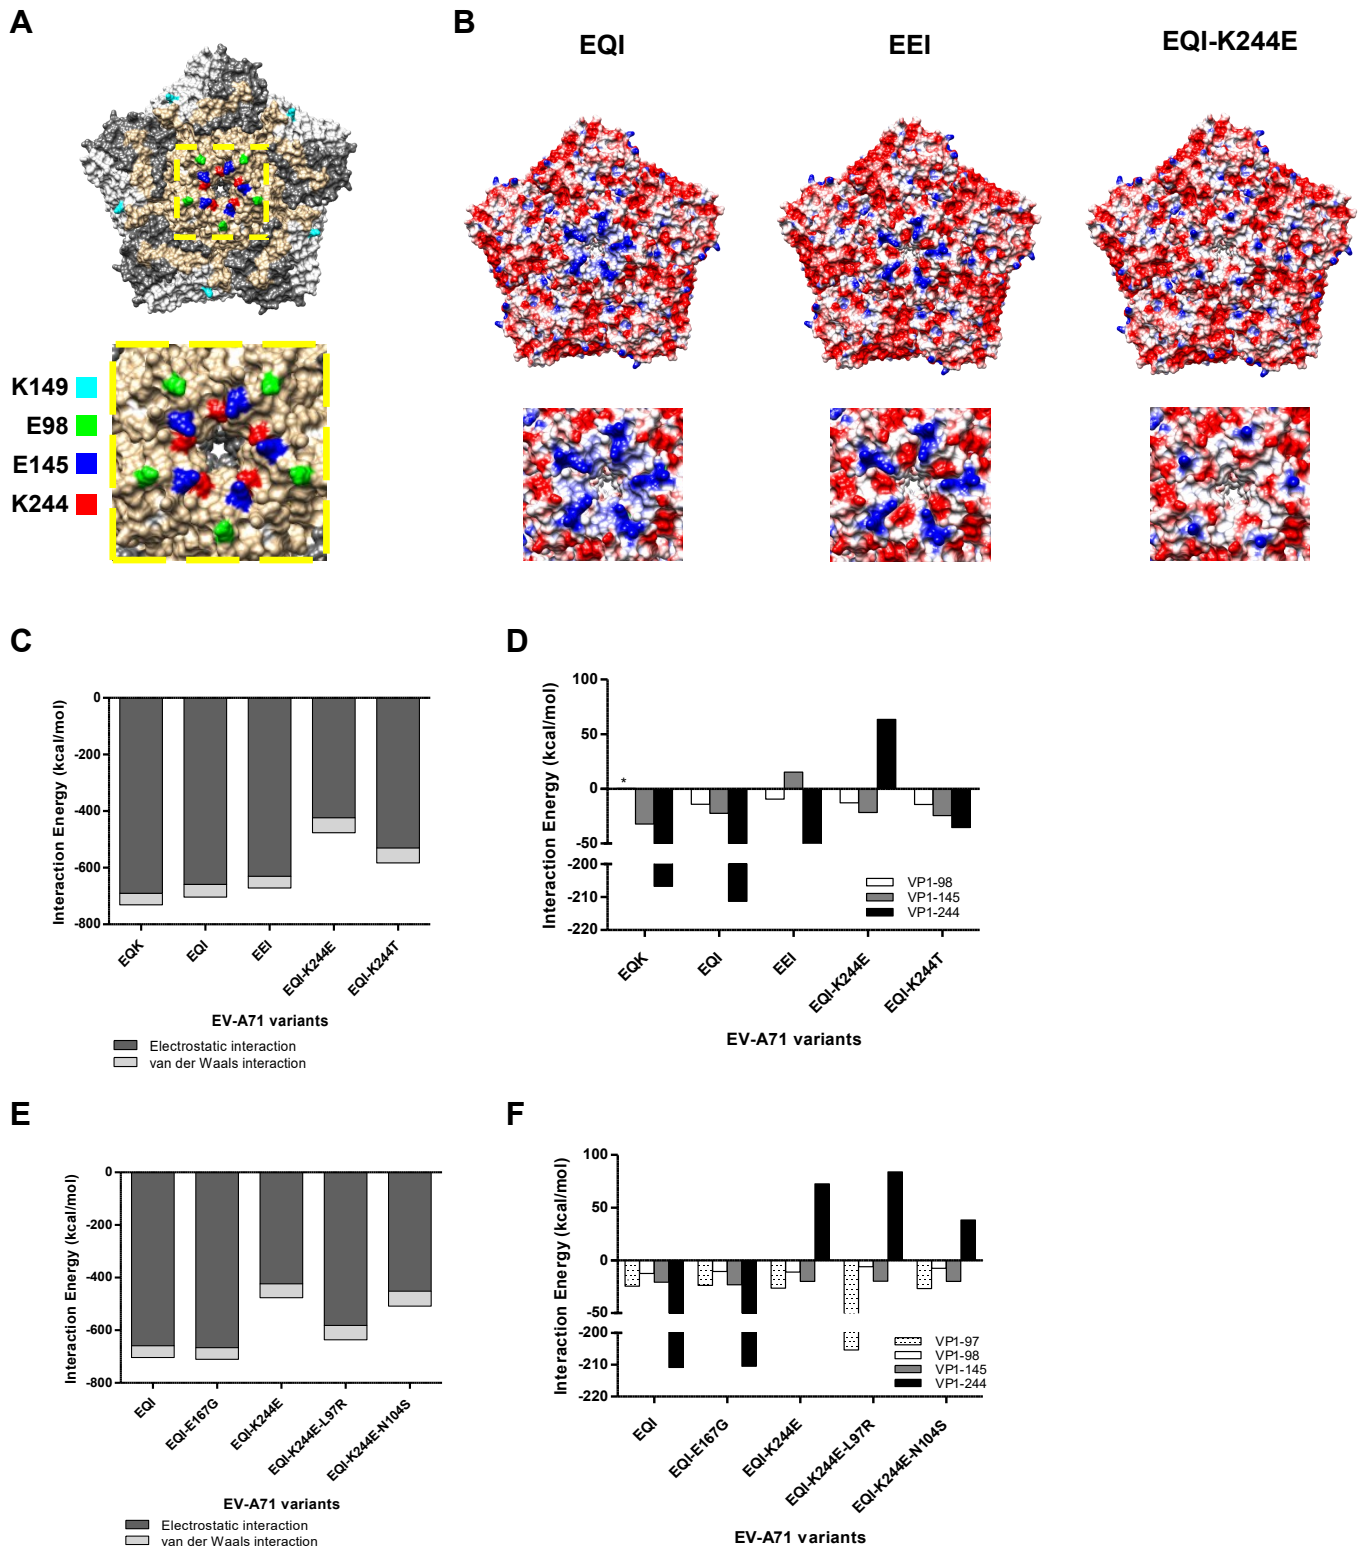

**Fig 8 . Comparison of electrostatic surface properties of the EV-A71 structure**

The analyzed amino acid residues are labelled in different colors in the EV-A71 capsid pentamer structure (PDB ID: 4AED). (A) The front views of the EV-A71 pentamer are displayed along with a magnified view of the five-fold axis using Chimera 1.10.1. (B) Electrostatic surface properties of EQI, EEI and EQI-K244E variants were examined. Electrostatic charges are contoured from red (-5 kcal/mol·e, negatively-charged) to blue (+5 kcal/mol·e, positively-charged). Magnified views of the five-fold axis are shown for each variant. Total interaction energy (C) and individual interaction energy of residues (D) within a 4Å radius of EV-A71 variants and VP1-244 variants docked to heparin were evaluated. Total interaction energy (E) and individual interaction energy of residues (F) within a 4Å radius of other mutations detected from NGS docked to heparin were examined.

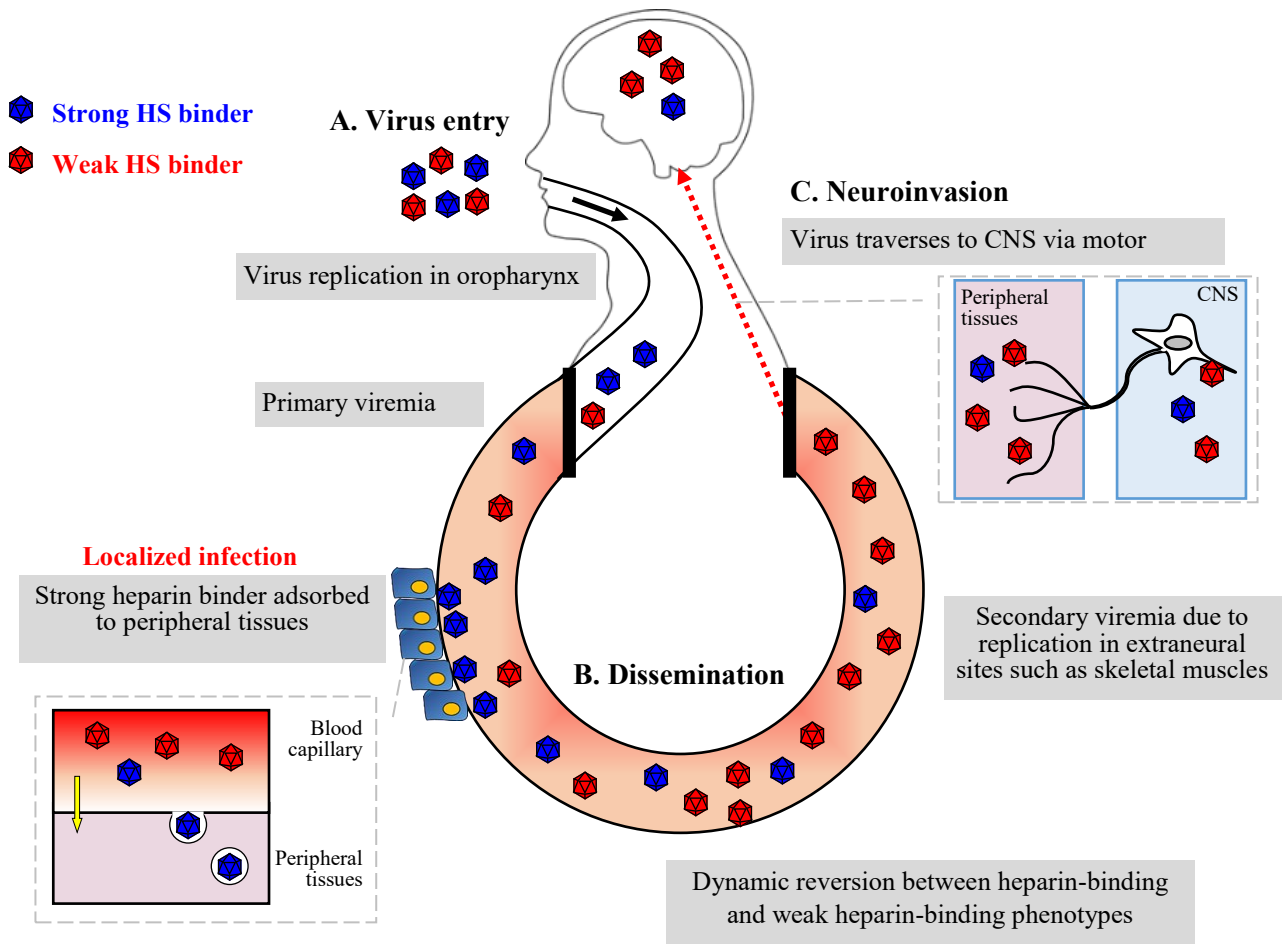

**Fig 9. Hypothesized model of EV-A71 heparin-dependent pathogenesis in human.**

Three major factors are responsible for EV-A71 virulence determination, namely virus entry, peripheral dissemination and neuroinvasion. (A) Both strong and weak heparin binders infect humans at the same rate, using the same inoculation route and receptor. (B) Viremia is established upon virus entry. Strong heparin binders are more readily removed from the blood circulation by binding to peripheral tissues due to their high affinity to heparin. Meanwhile, weak heparin binders give rise to higher viremia with better dissemination to other organs, resulting in higher peripheral virulence. (C) Neuroinvasion occurs when virus travels from peripheral motor nerves to the CNS via retrograde axonal transport .

**S1 Table. Comparison of EV-A71 isolate sequences of primary specimens and passaged isolates .**

Strong heparin binders (denoted with asterisks) were more frequently identified from sequencing of passaged EV-A71 than from direct sequencing of primary specimens , suggesting that the virus isolates have undergone heparin-binding adaptation in tissue culture ( $P < 0.00001$ , chi-square test ).

| Sequence combination | Sequencing approach             |                |                                            |                |
|----------------------|---------------------------------|----------------|--------------------------------------------|----------------|
|                      | Direct sequencing               |                | Sequencing from tissue culture propagation |                |
|                      | Number of sequences             | Percentage (%) | Number of sequences                        | Percentage (%) |
| EEK                  | 218                             | 88.62          | 142                                        | 63.96          |
| EQK*                 | 4                               | 1.63           | 13                                         | 5.86           |
| EGK*                 | 9                               | 3.66           | 30                                         | 13.52          |
| KEK*                 | 13                              | 5.28           | 31                                         | 13.96          |
| Others               | 2                               | 0.81           | 6                                          | 2.70           |
| Total                | 246                             | 100.00         | 222                                        | 100.00         |
| Chi-square test      | $\chi^2 = 40.3558. P < 0.00001$ |                |                                            |                |

**S2 Table. Primer sequences used for RT-PCR and qRT-PCR.**

Primer sets used for EV-A71 VP1 sequencing and qRT-PCR are shown.

| <b>Primer</b>        | <b>Sequence (5' to 3')</b>                                                |
|----------------------|---------------------------------------------------------------------------|
| EV71-VP1 F           | GCACTAGCGGCAGCCCAGAAGAA                                                   |
| EV71-VP1 R           | GAGCTATCTTCCCAGACGAGGTTC                                                  |
| EV71-real time F     | GAGCTCTATAGGAGATAGTGTGAGTAGGG                                             |
| EV71-real time R     | ATGACTGCTCACCTGCGTGTT                                                     |
| EV71-real time probe | 6-carboxyfluorescein (FAM)-ACTTACCCA/ZEN/GGCCCTGCCAGCTCG-Iowa<br>Black FQ |

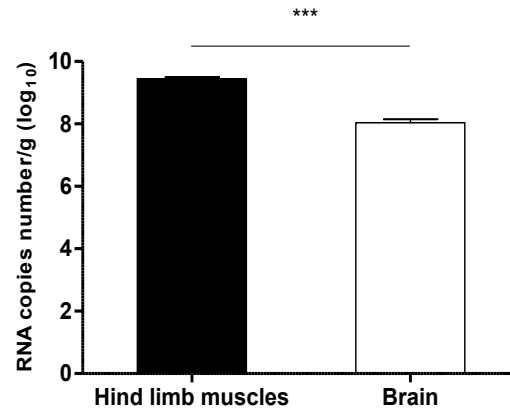

**S1 Fig. Comparison of viral loads from muscles and brain in mice infected through the i.c. route.**

One-day old suckling mice (n=3) were infected with EEI through i.c. route of administration. At day 4 post-infection, muscles and brains were harvested and viral loads were quantitated using qRT-PCR. Significant comparisons are labelled \*\*\* ( $P < 0.001$ ).

A

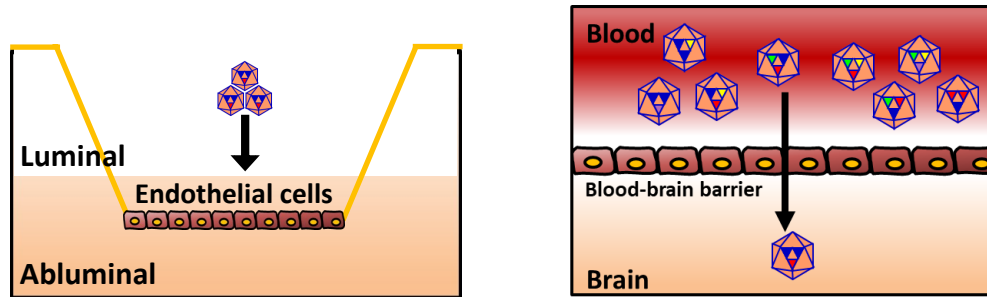

B

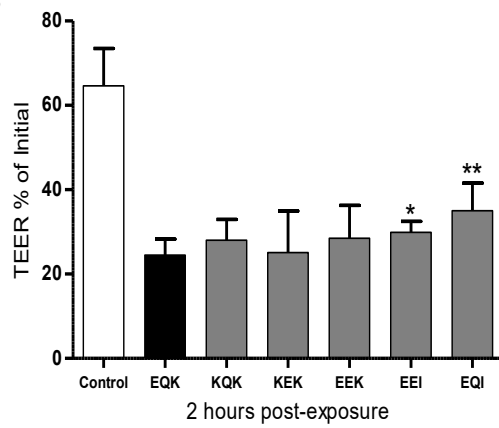

C

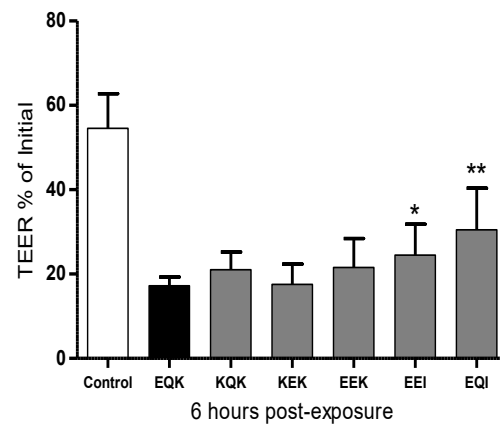

### S2 Fig. Effects of EV-A71 exposure on a porcine *in vitro* BBB model.

Illustration of the porcine *in vitro* BBB model which simulates the movement of virus particles through an *in vivo* BBB, in which the luminal side represents the blood capillary while the abluminal compartment represents the brain (A). The *in vitro* model was exposed to different EV-A71 variants with titer of  $1 \times 10^5$  PFU. The BBB permeability induced by EV-A71 variants were assessed in terms of transendothelial electrical resistance (TEER), with a greater reduction of TEER indicating greater permeability of BBB. The TEER was recorded at 2 hours (B) and 6 hours post-exposure (C) along with non-infected cell controls (white bars) and normalized with TEER values measured before virus exposure. Results are presented as mean  $\pm$  SD (n=6). Significant differences between viral variants and WT (black bars) are labelled as \* ( $P < 0.05$ ) and \*\* ( $P < 0.01$ ), using the Student's *t* test.

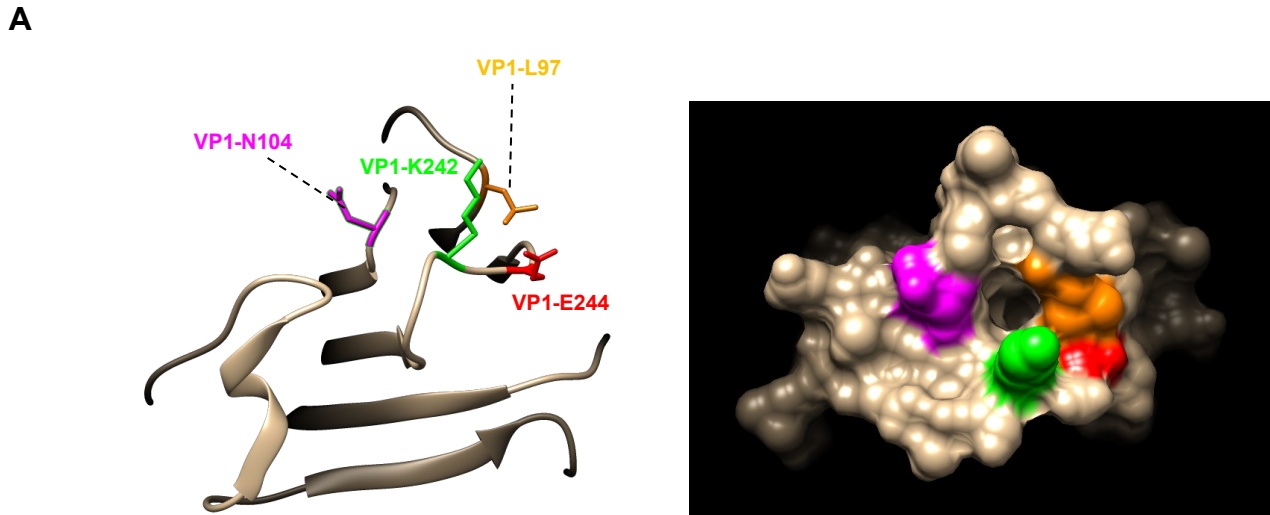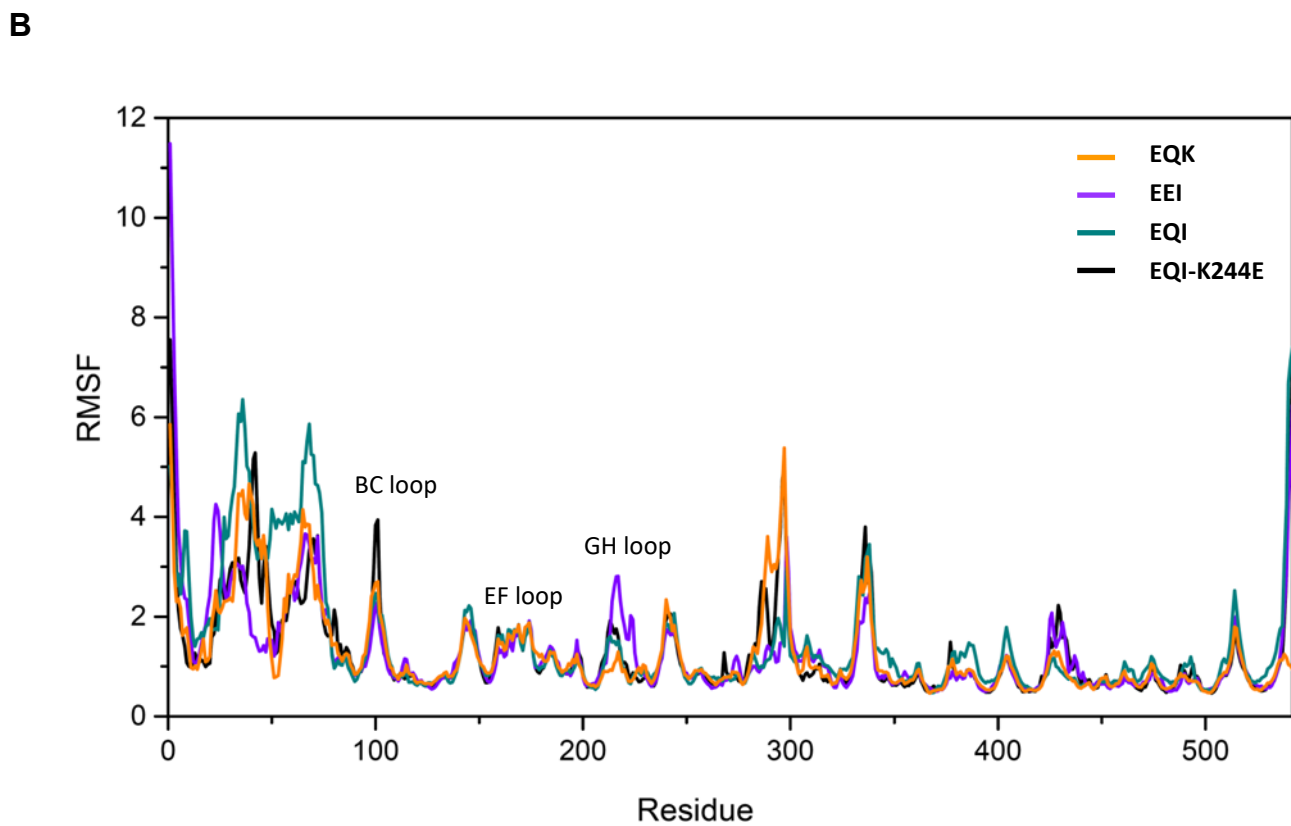

**S3 Fig. Structural modelling of EQI-K244E variant and root mean square fluctuation analysis of different EV-A71 variants.**

(A) Structural modelling of VP1 amino acid residues of EQI-K244E (left panel). Each important amino acid is labelled with different colors: VP1-E244 in red, VP1-K242 in green, VP1-L97 in orange and VP1-N104 in magenta. Note that VP1-E145 is not visible from this angle. The surface of EQI-K244E (right panel) is displayed corresponding to the structural model. (B) Root mean square fluctuation (RMSF) value of VP1 and VP2 amino acids are displayed for different variants. VP1 comprises residues 1-297 whereas VP2 consists of residues 298-542. BC, EF and GH loops of VP1 are labelled accordingly.
